# 1 **Root system influence on high dimensional leaf phenotypes over the grapevine** 2 **growing season**

3

4 Zachary N. Harris<sup>1,2</sup>, Laura L. Klein<sup>1,2</sup>, Mani Awale<sup>3</sup>, Joel F. Swift<sup>1,2</sup>, Zoë Migicovsky<sup>4</sup>, Niyati Bhakta<sup>1,2</sup>,  
5 Emma Frawley<sup>1,2</sup>, Daniel H. Chitwood<sup>5,6</sup>, Anne Fennell<sup>7</sup>, Laszlo G. Kovacs<sup>8</sup>, Misha Kwasniewski<sup>3</sup>, Jason  
6 P. Londo<sup>9</sup>, Qin Ma<sup>10</sup>, and Allison J. Miller<sup>1,2</sup>

7

8 <sup>1</sup>Department of Biology, Saint Louis University, 3507 Laclede Avenue, St. Louis, MO, 63103-2010, USA

9 <sup>2</sup>Donald Danforth Plant Science Center, 975 North Warson Road, St. Louis, MO, 63132-2918, USA

10 <sup>3</sup>Division of Plant Sciences, University of Missouri, 135 Eckles Hall, Columbia, MO, 65211, USA

11 <sup>4</sup>Department of Plant, Food, and Environmental Sciences, Faculty of Agriculture, Dalhousie University,  
12 Truro, NS, B2N 5E3, Canada

13 <sup>5</sup>Department of Horticulture, Michigan State University, East Lansing, MI, 48824, USA

14 <sup>6</sup>Department of Computational Mathematics, Science and Engineering, Michigan State University, East  
15 Lansing, MI, 48824, USA

16 <sup>7</sup>Department of Agronomy, Horticulture & Plant Science, South Dakota State University, Brookings, SD,  
17 57006, USA

18 <sup>8</sup>Department of Biology, Missouri State University, 901S. National Avenue, Springfield, MO, 65897,  
19 USA

20 <sup>9</sup>United States Department of Agriculture, Agricultural Research Service: Grape Genetics Research Unit,  
21 630 West North Street, Geneva, NY, 14456-1371, USA

22 <sup>10</sup>Department of Biomedical Informatics, The Ohio State University, 1585 Neil Ave, Columbus, OH,  
23 43210

24

25 Key Words: Grapevine, grafting, phenomics, phenotypic variation, phenotypic covariation

26

## 27 **Summary:**

- 28
- 29 • In many perennial crops, grafting the root system of one individual to the shoot system of another  
30 individual has become an integral part of propagation performed at industrial scales to enhance  
31 pest, disease, and stress tolerance and to regulate yield and vigor. Grafted plants offer important  
32 experimental systems for understanding the extent and seasonality of root system effects on shoot  
system biology.

- 33 ● Using an experimental vineyard where a common scion ‘Chambourcin’ is growing ungrafted and  
34 grafted to three different rootstocks, we explore associations between root system genotype and  
35 leaf phenotypes in grafted grapevines across a growing season. We quantified five high-  
36 dimensional leaf phenotyping modalities: ionomics, metabolomics, transcriptomics,  
37 morphometrics, and physiology and show that rootstock influence is subtle but ubiquitous across  
38 modalities.
- 39 ● We find strong signatures of rootstock influence on the leaf ionome, with unique signatures  
40 detected at each phenological stage. Moreover, all phenotypes and patterns of phenotypic  
41 covariation were highly dynamic across the season.
- 42 ● These findings expand upon previously identified patterns to suggest that the influence of root  
43 system on shoot system phenotypes is complex and broad understanding necessitates volumes of  
44 high-dimensional, multi-scale data previously unmet.

45

## 46 **Introduction**

47

48 High-throughput data acquisition has afforded unprecedented capacity to quantify and understand  
49 plant phenotypes. Recent advances in imaging and computation have expanded our ability to measure  
50 plant form (Ubbens & Stavness, 2017; Gehan *et al.*, 2017), and to extend those comprehensive  
51 measurements into latent space phenotypes (Ubbens *et al.*, 2020). Phenomics is characterized as the  
52 acquisition and analysis of high-dimensional phenotypic data at hierarchical levels (Soulé, 1967; Houle *et*  
53 *al.*, 2010), often with an eye toward multiscale data integration. This holistic and hierarchical approach to  
54 plant form and function affords unique insight into how plants change over developmental time, and in  
55 response to environmental cues and horticultural manipulation.

56 One common horticultural manipulation is grafting, the ancient agricultural practice that joins the  
57 stem of one plant (the scion) with the root system of another plant (the rootstock) (Mudge *et al.*, 2009). In  
58 agriculture, grafting is commonly used to confer favorable phenotypes that preferred scions lack. Such  
59 phenotypes include enhanced disease resistance (Pouget, 1990; Walker *et al.*, 2014), fruit quality, plant  
60 form (Warschefsky *et al.*, 2016), response to water stress (Tramontini *et al.*, 2013), and growth on  
61 particular soils (Bavaresco & Lovisolo, 2015; Ferlito *et al.*, 2020). Because grafting involves the union of  
62 a scion with a different (genetically distinct) rootstock, it offers a valuable experimental system in which  
63 root system impacts on shoot system phenotypes can be evaluated.

64 The cultivated grapevine, *Vitis* spp., is among the most economically important fruit crops in the  
65 world. Grapevines are cultivated primarily for fruits used to make wine and juice, as well as for table  
66 grape and raisin production. Most work on the molecular response to grafting in grapevine shows a

67 remarkable breadth of scion response patterns. For example, a study of ‘Cabernet Sauvignon’ grafted to  
68 different rootstocks identified transcriptome reprogramming in the scion of grafted plants; this appeared  
69 to be a general effect of grafting to a rootstock and was not rootstock-specific (Cookson & Ollat, 2013).  
70 In contrast, other studies have found signatures of rootstock genotype in the transcriptome in early berry  
71 development, although this distinction was lost in later development (Berdeja *et al.*, 2015; Corso *et al.*,  
72 2016), but see (Zombardo *et al.*, 2020). Collectively, these studies suggest the effects of grafting are  
73 diverse and may vary over the course of vine development.

74 Comprehensive phenomic analyses, including those that link transcriptome data with other high-  
75 throughput phenotypic assays, offer an opportunity to expand understanding of grafting effects on  
76 grapevine shoots. For example, leaves of the cultivar ‘Gaglioppo’ show variation in stilbene and abscisic  
77 acid concentrations due to rootstock genotype, as well as differences in transcriptional profiles (Chitarra  
78 *et al.*, 2017). Likewise, gene expression, ion concentrations, and leaf shape in the cultivar ‘Chambourcin’  
79 varied in response to rootstock genotype (Chitarra *et al.*, 2017; Migicovsky *et al.*, 2019a). Nonetheless,  
80 questions remain regarding variation imparted by grafting over the course of the growing season and the  
81 extent to which different phenotypes covary.

82 Grapevine leaves are the main photosynthetic engine of the organism and a primary site for  
83 perception and response to environmental change. Leaves present a wide variety of highly variable and  
84 readily assayable phenotypes, providing an important opportunity for comprehensive phenomic  
85 assessment. Grapevine leaves have been used for centuries as markers of species and cultivar  
86 delimitation, developmental variation, disease presence, and nutrient deficiency (Galet, 1979; Mullins *et al.*  
87 *et al.*, 1992). More recently, analysis of grapevine leaf morphology has identified genetic architecture of leaf  
88 shapes (Chitwood *et al.*, 2014), developmental patterns across the season (Chitwood *et al.*, 2015), and  
89 signatures of evolution in the grapevine genus (Klein *et al.*, 2017). Grapevine leaves respond to stress  
90 through gas and water exchange with the atmosphere (Williams & Grimes, 1987; Grimes & Williams,  
91 1990) and have been shown to differentially partition the ionome depending on their position on the shoot  
92 (Migicovsky *et al.*, 2019a) and their rootstock genotype (Lecourt *et al.*, 2015; Migicovsky *et al.*, 2019a;  
93 Gautier *et al.*, 2020a). The volume of work on grapevine leaves provides a foundation for the analysis of  
94 phenomic variation in a vineyard over a season in response to grafting.

95 In this study, we investigate effects of seasonal variation and grafting on leaf phenomic variation  
96 of the hybrid cultivar ‘Chambourcin’. We show that ionomic, metabolomic, transcriptomic,  
97 morphometric, and physiology phenotypes vary over the course of the season and reflect subtle but  
98 ubiquitous responses to grafting and rootstock genotype. Rootstock effects were often dynamic across the  
99 season, suggesting that accounting for seasonal variation could alter our understanding of grafting in  
100 viticulture.

101

## 102 **Methods**

103

### 104 *Study Design*

105 Data were collected in an experimental rootstock trial at the University of Missouri's Southwest  
106 Research Center (37.074167 N; 93.879167 W). Samples were collected in 2017 at three phenological  
107 stages: anthesis (~80% of open flowers; 22 May 2017); veraison (~50% of berries had transitioned from  
108 green to red; 30 July 2017); and immediately prior to harvest (25 September 2017). The vineyard includes  
109 the interspecific hybrid cultivar 'Chambourcin' growing ungrafted (own-rooted) and grafted to three  
110 rootstocks: '1103P', '3309C', and 'SO4'. Each of the four rootstock-scion combinations was replicated  
111 72 times for a total of 288 vines planted in nine rows. Each row was treated with one of three irrigation  
112 treatments: full evapotranspiration replacement, partial (50%) evapotranspiration replacement (reduced  
113 deficit irrigation; RDI), or no evapotranspiration replacement. Rainfall in 2017 likely mitigated the  
114 applied irrigation treatment (see: Supplemental Note 1). Vine position in the vineyard corresponded to  
115 time of sampling for some phenotypes, as samples were taken from one end of the vineyard to the other  
116 over the course of two to three hours. Because vineyard microclimates and sampling time may be  
117 associated with phenotypic variation, we defined 'temporal block' as a factor that captures this spatial and  
118 temporal variation inherent in sampling. Unique rootstock-scion combinations were planted in cells of  
119 four adjacent replicated vines, with rows consisting of eight cells. Depending on the phenotype being  
120 assayed, leaves were sampled from either the full vineyard (the 288-vine set) or from a nested set  
121 comprising 72 vines representing the middle two vines in each four-vine cell (the 72-vine set).

122

### 123 *Leaf Ionomics*

124 The ionome describes concentrations of ions in a tissue at a particular time point (Salt *et al.*,  
125 2008). From the 288-vine set, three leaves were collected along a single shoot: the youngest fully opened  
126 leaf at the shoot tip, the approximate middle leaf, and the oldest leaf at the shoot base. Leaves were  
127 sampled from primary shoots, placed in zip-lock bags in the field and dried in coin envelopes at 50°C for  
128 one to three days. Between 20 and 100 mg of leaf tissue was acid digested and 20 ions were quantified  
129 using inductively coupled plasma mass spectrometry (ICP-MS) following standard protocol (Baxter,  
130 2010; Ziegler *et al.*, 2013) at the Donald Danforth Plant Science Center (DDPSC). Ion quantifications  
131 were corrected for sample losses, internal standard concentrations, instrument drift and by initial sample  
132 mass as part of the DDPSC Ionomics Pipeline. For each ion concentration, we computed z-score  
133 distributions and used those values as the basis for linear models. Non-standardized values were used for  
134 machine learning analysis.

135

### 136 *Leaf Metabolomics*

137         The metabolome represents a catalogue of small molecules present in a tissue, likely stemming  
138 from metabolic processes (Oliver *et al.*, 1998; Tweeddale *et al.*, 1998). Metabolomic analysis was  
139 completed at veraison and harvest on the 72-vine set. Three mature leaves were sampled from the middle  
140 of a shoot and immediately flash frozen in liquid nitrogen to capture the metabolic state of the leaves  
141 when attached to the vine. Frozen leaves were transported to the University of Missouri Enology lab on  
142 dry ice and stored at -80°C. Leaf metabolomes were analyzed using a modified form of a previously  
143 established protocol (Islam *et al.*, 2011); Supplemental Note 2). LC-MS instrument files were converted  
144 to .cdf format and uploaded to XCMS online (Tautenhahn *et al.*, 2012) for chromatogram normalization  
145 and feature detection via “single job” parameters. Identified metabolomic features were used as the basis  
146 of a principal components (PC) analysis. The top 20 PCs were treated as distinct phenotypes to model  
147 according to the experimental design. In PCs that varied significantly by rootstock, features that loaded  
148 more than 1.96 standard deviations above or below the mean were fit independently with the same model  
149 design.

150

### 151 *Gene Expression*

152         The youngest fully-opened leaves (~1 cm) on two shoots were collected from each plant of the  
153 72-vine set and pooled for RNA sequencing. Samples were sequenced using 3'-RNAseq, a method ideal  
154 for organisms with reasonably characterized reference genomes (Tandonnet & Torres, 2017). The first 12  
155 nucleotides from each read were trimmed to remove low-quality sequences using Trimmomatic (options:  
156 HEADCROP:12; (Bolger *et al.*, 2014)). Low quality trimmed reads were additionally identified based on  
157 overrepresentation of kmers and removed using BBduk (April 2019 release) (Bushnell, 2017). Trimmed  
158 and QC-controlled reads were mapped to the 12Xv2 reference *Vitis vinifera* genome (Jaillon *et al.*, 2007;  
159 Canaguier *et al.*, 2017) using STAR (v2.7.2b) (Dobin *et al.*, 2013) with default alignment parameters.  
160 RNAseq read alignments were quantified using HTSeq-count (v0.11.2) (Anders *et al.*, 2010) and a  
161 modified version of the VCost.v3 reference *V. vinifera* genome annotation (Canaguier *et al.*, 2017). To  
162 capture mis-annotated gene body boundaries in the genome, all gene boundaries in the annotation were  
163 extended 500 bp.

164         Variation in gene expression was assessed using two methodologies. First, we identified  
165 individual genes which responded to specific factors in the experimental design using DESeq2 (Love *et al.*  
166 *et al.*, 2014). Genes were filtered to a gene set that included only genes with a normalized count greater than  
167 or equal to two in at least five samples. Each filtered gene was fit with the model “~ Block + Irrigation +  
168 Phenology\_Rootstock” where the ‘Phenology\_Rootstock’ model term was used to understand the

169 potential interaction of phenology and rootstock. Differentially expressed genes were identified for each  
170 pairwise contrast in the model. Second, we used principal component analysis (PCA) to identify co-  
171 expressed genes and analyzed the top PCs in the context of the broader experiment. Filtered genes were  
172 transformed using the variance stabilizing transformation (VST; (Anders & Huber, 2010)) and input into  
173 a PCA. To approximate the impacts of both spatial variation and pseudotime (row) in the vineyard, linear  
174 models were first fit to remove variation imparted by irrigation for each of the top 100 PCs. The residuals  
175 from these models were then used as the basis for linear models and as the basis for machine learning  
176 analysis.

177

### 178 *Leaf Shape*

179 All leaves from a single shoot directly emerging from a trained cordon were collected from each  
180 vine at 80% anthesis and veraison. At harvest, we collected only the oldest (first emerging leaf), middle  
181 (estimated from the middle of a whole shoot), and youngest (smallest fully emerged leaf at the shoot tip,  
182 >1cm). Leaves were collected approximately in row order (from south to north) and stored in a cooler.  
183 Each leaf was imaged using an Epson DS-50000 scanner. In order to mimic the sampling regime at  
184 harvest, we subset the leaves collected at anthesis and veraison by extracting the youngest leaf, the  
185 approximate middle leaf, and the oldest leaf sampled.

186 We assessed leaf morphological variation using generalized procrustes analysis (GPA) of  
187 landmarks. For each leaf, 17 homologous landmark features were identified (Chitwood *et al.*, 2014). The  
188 GPA-rotated coordinate space was used for all subsequent statistical analysis including PCA in order to  
189 summarize variation in leaf shape (Dryden & Mardia, 2016). From the PCA, we extracted the top 20 PCs  
190 and fit linear models and machine learning models to describe variation.

191

### 192 *Vine physiology*

193 Intracellular CO<sub>2</sub> concentration, stomatal conductance and leaf transpiration rate were measured  
194 on a fully expanded sun-exposed leaf during midday (10 am to 1 pm) using an LI-6400XT Portable  
195 Photosynthesis system coupled with a pulse amplitude-modulated (PAM) leaf chamber fluorometer with  
196 the following parameters: incident photosynthetic photo flux density level of 1000  $\mu\text{mol m}^{-2} \text{s}^{-1}$   
197 generated by a red LED array and 10% blue light to maximize stomatal opening (Li-Cor, Inc., Lincoln,  
198 NE, USA), CO<sub>2</sub> mixer of 400  $\mu\text{mol/s}$ , fixed flow of 300  $\mu\text{mol/s}$ , and ambient leaf and block temperature.  
199 Soil moisture was measured for each plant in the 72-vine set using a fieldScout TDR 300 Moisture meter  
200 equipped with 20 cm rods (Spectrum Technologies, Inc. Aurora, IL, USA). Midday stem water potential  
201 was measured using a pressure bomb/chamber (PMS Instrument Co., Albany, OR, USA) after enclosing

202 the leaves in an aluminum foil bag for at least 15 minutes to equilibrate the water potential of the xylem in  
203 the stem to that of attached leaf.

204

### 205 *Linear Models*

206 Linear models were fit to the 20 measured ion concentrations, the top 20 PCs of the leaf  
207 metabolome, the top 100 PCs of the leaf transcriptome, the top 20 PCs of leaf morphospace, and each  
208 measured physiological trait. Each model was fit with fixed effect factors representing phenological stage  
209 (anthesis, veraison, or harvest), rootstock (Ungrafted, '1103P', '3309C', or 'SO4'), leaf position  
210 (youngest, middle, or oldest; only used in leaf morphology and leaf ion concentration models), and all  
211 pairwise interactions of those terms. Both irrigation and block were included as fixed, non-interacting  
212 effects with the exceptions of physiology and metabolomics, for which we allowed the interaction of  
213 'Block' as it correlates with the time of sampling. Row, an additional correlate for time and spatial  
214 variation, was included in place of a temporal block for the gene expression models after removal of the  
215 variation attributable to irrigation, a factor collinear with row. All linear models were interpreted using a  
216 type-3 sum of squares computation using the R package 'car' (Fox *et al.*, 2013). Estimated p-values for  
217 each term in the models were corrected for multiple tests (within phenotype) using FDR correction as  
218 implemented by the R package 'stats' (R Core Team, 2013). Results from the models are reported as the  
219 variation explained by a particular term in the model and the estimated p-value. When appropriate, post-  
220 hoc mean comparisons were computed using the package 'emmeans' (Lenth *et al.*, 2018). Where multiple  
221 linear models were being simultaneously interpreted, we applied a Bonferonni correction to reduce the  
222 number of false positives.

223

### 224 *Machine Learning to Identify Rootstock Effects*

225 For visualization of between-class variation, we fit linear discriminant analysis models (LDA) to  
226 the full phenotypic data sets of ionomics, metabolomics, gene expression, and leaf morphology using the  
227 'lda' function of the R package 'MASS' (Ripley, 2002). Projections of all samples into the LD space were  
228 plotted using ggplot2 (Wickham, 2016). In addition, we employed machine learning to capture subtle  
229 experimental effects. We partitioned phenotypic data sets into 80% training partitions and 20% testing  
230 partitions. Models were fit to predict the phenological stage from which a sample was taken, the rootstock  
231 to which the scion was grafted, and the joint prediction of phenology and rootstock. We also tested the  
232 predictability of leaf position for ionomics and leaf shape, and the interaction of rootstock and leaf  
233 position for ionomics. We used the 'randomForest' (Liaw *et al.*, 2002) implementation of the random  
234 forest algorithm. Models were fit and tuned using the R package 'caret' (Kuhn, 2013). Each performance  
235 was assessed using accuracy, with performance on each class being assessed using the balanced accuracy,

236 the midpoint of class-wise sensitivity and specificity. Where appropriate, models were compared to  
237 ‘chance’, or the occurrence frequency of each class. Confusion matrices were visualized from the out-of-  
238 bag predictions using ggplot2. Important features were identified from the randomForest object based on  
239 a phenotype-specific mean decrease in model accuracy (MDA).

240

#### 241 *Phenomic trait covariation*

242 We extracted from each data set the youngest available leaf from the 72 vine-set from which  
243 ionomics, metabolomics, gene expression, and leaf shape were measured. Each class of phenotypic data  
244 was summarized along the primary dimensions of variation using PCA. For each class, we extracted the  
245 top 10 PCs and fit Pearson’s correlations across all pairs of PCs at each phenological stage. P-values from  
246 computed correlations were corrected using the FDR method from the package ‘stats’ (Team & Others,  
247 2013). Correlations and their strengths were visualized using the R package ‘igraph’ (Csardi *et al.*, 2006).  
248 Example correlations were reported after running 10,000 bootstrapped subsamples of 90% of data for  
249 paired traits. From the distribution of estimated correlation coefficients, confidence intervals were  
250 computed from the 0.025 and 0.975 quantiles. A subset of example correlations were plotted using the R  
251 package ‘ggplot2’ (Wickham, 2016).

252

## 253 **Results**

254

### 255 *Leaf ionome*

256 To characterize the leaf ionome over the growing season, we sampled the youngest, middle, and  
257 oldest leaf on a single shoot from each of 288 vines at three phenological stages for ionomics analysis  
258 (Fig. 1). Bivariate correlations showed that ion concentrations are not independent of each other.  
259 However, the strength and direction of relationships between ions vary with respect to most experimental  
260 factors (for example, phenological stage and leaf position; Sup Fig. 1). As such, we fit independent linear  
261 models to each ion. Leaf position, phenological stage, or the interaction of phenological stage and leaf  
262 position explained the highest amount of variation for most ions (Fig. 1a-b). Many ions significant for the  
263 interaction showed a clear signal of leaf position at anthesis and veraison, and either no explainable  
264 variation or muted variation at harvest. For example, calcium (Fig 1b) varied with leaf position (22.7%;  $p$   
265  $< 1e-05$ ), phenology (24.0%;  $p < 1e-05$ ), and their interaction (7.4%,  $p < 1e-05$ ). All possible pairwise  
266 combinations of leaf position were significantly different at anthesis, and both the youngest and middle  
267 leaves were different from the oldest leaves at veraison and harvest. In the case of potassium (Fig 1b),  
268 significant variation was explained by leaf position (16.1%;  $p < 1e-05$ ), phenology (19.6%;  $p < 1e-05$ ),  
269 and their interaction (10.6%;  $p < 1e-05$ ). However, post-hoc comparisons showed that differences were



270 present only at anthesis and veraison. Ions that responded weakly to the interaction of leaf position and  
271 phenology tended to show significant variation explained by the interaction of rootstock and phenology  
272 (see below). These ions showed similar patterns to the leaf position by phenology interaction where clear  
273 signal is exhibited at anthesis and veraison then is either absent or muted at harvest (see, for example,  
274 cobalt and nickel; Fig 1c).

275 Machine learning on ion concentrations showed that rootstock and the interactions of rootstock  
276 with phenology and leaf position were independently predictable classifications. A random forest model  
277 trained to predict rootstock showed an overall accuracy of 75.2% (Fig 1d). Ions important for this  
278 classification were nickel (MDA=0.089), molybdenum (MDA=0.058), and magnesium (MDA=0.054).  
279 Notably, when we trained a model to simultaneously predict phenological stage and rootstock, rootstock  
280 prediction accuracy increased appreciably (Fig. 1e). For example, the ability of the model to detect  
281 ungrafted vines (the balanced accuracy of ungrafted predictions) improved from 81.7% accuracy overall  
282 to 91.1% accuracy at anthesis and 85.9% at harvest. Generally, performance at veraison matched the  
283 rootstock-only model performance. The ions most important for this simultaneous classification were  
284 nickel (MDA=0.167), phosphorus (MDA=0.110), and strontium (MDA=0.065). Interestingly, the joint  
285 prediction of rootstock and leaf prediction performed substantially better than chance ( $p < 1e-05$ ),  
286 however average performance of the model as assessed through class-wise balanced accuracies were  
287 comparable to if not slightly worse than just predicting rootstock (Fig 1f). Ions important for this  
288 classification were sulfur (MDA = 0.051), rubidium (MDA = 0.051), and nickel (MDA = 0.049).

### 289 *Leaf metabolomics*

291 We performed untargeted metabolomics on leaves from 72 vines at veraison and harvest,  
292 quantifying the concentrations of 661 metabolites (Fig. 2). The top 20 PCs accounted for a total of 67.3%  
293 of the total metabolomic variation, with the top three capturing 23.1%, 9.2%, and 6.2%, respectively.  
294 Linear models for each of the top 20 PCs found that the strongest drivers of variation in leaf  
295 metabolomics were phenology and temporal blocking factor. For example, 90.6% of variation on PC1  
296 was due to phenology ( $p < 1e-05$ ; Fig 2a). PC2 primarily reflected the interaction of phenology and  
297 temporal block (26.4%,  $p < 1e-05$ ) and temporal block as a main effect (18.9%,  $p < 1e-05$ ). The patterns  
298 of variation attributable to PC2 were similar in PCs 3-10 (Fig 2a).

299 PC17 was controlled by rootstock as a main effect (18.5%,  $p < 1e-03$ ; Fig 2b). On PC17,  
300 ungrafted vines were significantly different from vines grafted to '3309C' ( $p = 0.02$ ) and 'SO4' ( $p < 1e-$   
301  $05$ ). Vines grafted to '1103P' were also significantly different from vines grafted to 'SO4' ( $p = 0.009$ ).  
302 Metabolites that loaded more than 1.96 sd from the mean loading on PC17 were extracted and  
303 independently fit to additional linear models. We identified four metabolite features (M374T1 [ $r_t = 1.33$ ,

304 m/z = 374.1146], M117T1 [rt = 0.61, m/z = 117.0583], M175T1\_1 [rt = 0.87, m/z = 175.1269], and  
305 M333T1\_3 [rt = 0.71; m/z = 333.1582]) which were influenced by rootstock as a main effect and the  
306 metabolite (M112T1 [rt = 1.48, m/z = 112.0061]) which was influenced by the interaction of rootstock  
307 genotype and phenological stage.

308 Linear discriminant analysis confirmed that many experimental factors likely influence the  
309 metabolome. For example, when trained to maximize variation between classes of rootstocks, the model  
310 identified a space that weakly separates ‘1103P’-grafted and ‘SO4’-grafted vines from Ungrafted and  
311 3309C-grafted vines (LD1) and separates 3309C-grafted vines from other classes (on LD2) (Fig 2c).  
312 Despite this, machine learning showed minimal predictability for any class other than phenology, which  
313 was predictable with an accuracy of 100% for withheld samples. Rootstock genotype was not predictable  
314 with accuracy only marginally better than chance (34.6%).

### 315 316 *Gene Expression*

317 We performed 3’-RNAseq on 72 vines at three time points (Fig. 3). We identified variation in  
318 23,460 genes that had a DESeq2-normalized count greater than two in at least five samples. Hierarchical  
319 clustering of the 500 most variable genes after variance stabilizing transformation (VST) showed that  
320 most variation in the transcriptome was explained by phenological stage (Fig 3a). The top 100 PCs on the  
321 VST-transformed gene counts accounted for nearly 92.3% of variation in the transcriptome. Linear  
322 models on each of the top 100 PCs indicated that 82.4% and 61.4% of the variation on PC1 and PC2  
323 respectively were attributable to the phenological stage (Fig 3b-c). Row was also a significant descriptor  
324 of variation as a single, fixed effect and in interactions with rootstock and phenological stage. For  
325 example, row accounted for 36.0% and 43.3% of the variation on PC4 and PC6, respectively. Interacting  
326 with phenological stage, row accounted for >10% of variation on 17 additional PCs.

327 LDA to separate phenological stages defined three distinct, non-overlapping groups in the space  
328 spanning LD1 and LD2 (Sup Fig. 2). When trying to separate rows into distinct classes, the model  
329 converged on a ‘horseshoe’ shape in the LD1- LD2 space (Fig 3d). LD1 maximized the variation between  
330 row 8 (sampled early in the day) and row 16 (sampled a few hours later). LD2 maximized the separation  
331 of both rows 8 and 16 with row 12 (the row sampled in the middle of the sampling window). A model  
332 trained to separate rootstock classes (Fig. 3e) showed that LD1 separated the rootstock 1103P from other  
333 rootstock genotypes, and LD2 primarily separated the rootstock ‘3309C’ from ungrafted vines (Sup Fig.  
334 2).

335 Formal machine learning on gene expression PCs largely supported the linear models. A random  
336 forest trained to predict phenological stage classified testing samples with 92.9% accuracy. Anthesis was  
337 the most predictable class with a balanced accuracy of 100%; veraison and harvest displayed balanced

338 accuracies of 92.7% and 92.4%, respectively. The PCs most important in phenology prediction were PC1  
339 (MDA = 0.16) and PC2 (MDA = 0.12). Gene expression PCs were unable to predict rootstock, with a  
340 total prediction accuracy of 23.4%. While no features were especially important in the prediction  
341 processes, PC44 showed the largest mean decrease in Gini impurity corroborating its signal in the linear  
342 models.

343

#### 344 *Leaf shape*

345 We collected leaves from the 288-vine set at three time points and landmarked a total of 2,422  
346 leaves (Fig. 4). Homologous leaf landmarks were used for generalized procrustes analysis (GPA). PCA  
347 on the GPA-rotated coordinates revealed ~97.2% of the total shape variation was captured by the top 20  
348 principal components with PC1, PC2, and PC3 explaining 24.1%, 19.0%, and 13.3% of the variation  
349 respectively. Lower values on PC1 primarily capture leaves with shallow petiolar sinuses and short  
350 midvein distance from the depth of the superior sinus to the top of the midvein, whereas higher values on  
351 PC1 capture the opposite (Fig. 4a). Similarly, lower values on PC2 capture deep petiolar sinuses  
352 combined with very shallow superior sinuses, and vice versa for higher values. PC3 primarily captures  
353 asymmetry (Fig. 4a).

354 In total, only 5.76% of variation on PC1 was explained by the experimental design, with most  
355 variation explained by phenology (2.63%;  $\text{padj} < 1e-05$ ), rootstock (0.95%;  $\text{padj} < 0.001$ ), leaf position  
356 (2.61%;  $\text{padj} = 0.03$ ), and the interaction of phenology and leaf position (0.62%;  $\text{padj} = 0.009$ ) (Sup Fig  
357 3a). Post-hoc mean comparisons on PC1 showed that shapes of leaves from ungrafted vines were  
358 significantly different from leaves of vines grafted to 3309C ( $p < 0.001$ ) and SO4 ( $p < 0.001$ ) (Sup Fig  
359 3b). Moreover, PC1 captured subtle variation in the leaf position by phenological stage interaction where  
360 middle leaves showed significant differences between anthesis and veraison ( $p < 1e-03$ ), and the oldest  
361 leaves showed significant differences when comparing anthesis to veraison ( $p < 1e-05$ ) and anthesis to  
362 harvest ( $p < 1e-03$ ).

363 For PC2, 61.4% of variation could be assigned to an experimental factor. This included  
364 significant variation from leaf position (46.9%,  $\text{padj} < 1e-05$ ), phenology (1.4%;  $\text{padj} < 1e-05$ ), and the  
365 interaction of leaf position and phenology (12.05%;  $\text{padj} < 1e-05$ ; Fig 4d). Specifically, younger leaves  
366 tended to have shallower sinuses and exaggerated superior sinus depths (higher values on PC2), whereas  
367 older leaves tended to develop deeper petiolar sinuses and more shallow superior sinuses (lower values on  
368 PC2). The degree of this separation decreased across the season, and the shapes converged on the mean  
369 leaf shape on PC2, consistent with the middle leaf at all three phenological stages. PC2 additionally  
370 reflected the interaction of leaf position and rootstock (0.22%;  $p = 0.04$ ; (Sup Fig. 4b)), but post-hoc  
371 comparisons did not find any significant pairwise comparisons.

372 Machine learning on the GPA-rotated coordinate space identified moderate division of  
373 developmental and phenological classes. Random forest models could predict the leaf position with  
374 73.1% accuracy, with the most important feature being the y-component of the leaf apex (MDA = 0.051).  
375 A model trained to predict phenology performed at 64.3% with the most important features being the x-  
376 components of the points corresponding to superior sinus depth (left sinus MDA = 0.030, right sinus  
377 MDA = 0.019). A model trained to predict rootstock performed only marginally better than chance at  
378 28.1% accuracy.

379

### 380 *Vine physiology*

381 For 72 plants in the vineyard, we measured intracellular CO<sub>2</sub> concentration (C<sub>i</sub>), stomatal  
382 conductance (g<sub>s</sub>), leaf transpiration, water potential ( $\psi$ ), and soil moisture (Fig. 5). Each physiological  
383 trait varied significantly across phenology and the block by phenology interaction (Fig 5a). For example,  
384 at harvest, we observed specific differences in leaf CO<sub>2</sub> concentration (A vs C: p=0.003; B vs C: p=0.002)  
385 and leaf transpiration (A vs B: p < 1e-03; A vs C: p < 1e-05; B vs C: p < 1e-05). Additionally, stomatal  
386 conductance and leaf transpiration rate varied significantly with the interaction of rootstock and  
387 phenology. For both traits, a post-hoc comparison of means showed that these values were elevated in  
388 1103P at veraison as compared to ungrafted vines (stomatal conductance: p = 0.002; leaf transpiration: p  
389 = 0.001; Fig 5b-c).

390

### 391 *Phenomic trait covariation*

392 For each of the 72 plants measured for all phenotypes in the vineyard, we explored the extent to  
393 which different phenotypes covaried (Fig. 6). Within each phenotyping modality, we summarized the  
394 primary dimensions of variation using PCA. From each PCA, we extracted the top ten PCs, which  
395 explained a total of 88.9% of variation in the ionomics PCA (iPCA), 55.9% of the variation for the  
396 metabolomics PCA (mPCA), 74.8% of the variation in the gene expression PCA (gPCA) and 87.9% of  
397 the variation in the leaf shape PCA (sPCA). Pairwise correlations of each PC within each phenological  
398 stage showed diverse correlation magnitudes and directions both within a phenotyping modality and  
399 between phenotyping modalities (Fig 6a-c). Generally, the strongest relationships were between PCs  
400 within phenotypic modalities. For example, the strongest correlations identified were between gPC1 and  
401 gPC2 at anthesis (r = 0.85, CI = [0.81, 0.87]; Sup Fig 4a), and mPC1 and mPC2 at harvest (r = -0.78, CI =  
402 [-0.82, -0.76]). Correlations between modalities represented a diversity of responses across phenological  
403 stages. For example, the correlation between gPC4 and sPC3 is similar across the phenological stages, but  
404 only the correlation at veraison is significant (r = 0.41, CI = [0.34, 0.47]; Sup. Fig 4b). Correlations such  
405 as between mPC3 and gPC6 were similar and significant at both veraison (r = -0.44, CI = [-0.50, -0.37];

406 Sup Fig 4c) and harvest ( $r = -0.37$ , CI = [-0.45, -0.28]; Fig 6c). While many correlations varied over the  
407 course of the season, some relationships entirely shifted in direction. For example, the correlation  
408 between mPC3 and mPC6 shifted from a positive significant relationship ( $r = 0.58$ , CI = [0.52, 0.63]) at  
409 veraison to a negative significant relationship at veraison ( $r = -0.66$ , CI = [-0.73, -0.59]) (Sup Fig 4d).

410

#### 411 **Discussion:**

412

413 In this study, we characterized variation in leaf ionomics, untargeted metabolomics, transcriptomics, leaf  
414 morphology, and physiology in an experimental rootstock vineyard at three distinct time points over the  
415 course of a growing season. Overall, we find that time of season was the primary driver of most leaf  
416 phenotypic variation, and that rootstock influences on leaf traits can be season-specific. Generally,  
417 ‘Chambourcin’ leaves show subtle responses to grafting, with the strongest signals observed in  
418 phenotypes for which the root systems have a noted and well-understood role (e.g., ion concentrations in  
419 leaves).

420

#### 421 *Phenology explains significant variation in all leaf phenotypes*

422 We found that the phenological stage was the strongest driver of phenotypic variation for most  
423 leaf phenotypes. For example, all 20 ions varied with the phenology and most ions showed that  
424 phenology, or the interaction of phenology with leaf developmental position, was the strongest source of  
425 variation (Fig. 1). Additionally, nearly one third of all measured transcripts responded to seasonal  
426 variation, and the strongest effects on the transcriptome were the phenology and the row, a correlate for  
427 the time within a three hour sampling window. The only phenotype for which phenology was not the  
428 most explanatory factor is leaf shape. Consistent with previous studies (Chitwood *et al.*, 2015), we  
429 confirm that most of the leaf shape variation measured reflects development along a single shoot, but  
430 much of this variation is explained via interaction with the phenology.

431 The seasonal component to grapevine phenotypic variation is a subject of much research,  
432 especially in the berry. In studies designed to characterize effects of cultivar variation and molecular  
433 underpinnings of terroir, seasonal variation was the strongest signal in the metabolome (Degu *et al.*, 2014;  
434 Anesi *et al.*, 2015; Cuadros-Inostroza *et al.*, 2016; Dal Santo *et al.*, 2016). Several studies have also  
435 sought to characterize transcriptomic variation over the course of the season. For example, in conjunction  
436 with metabolomics, seasonal variation of berry development was used to identify developmental markers  
437 in ‘Corvina’ (Zamboni *et al.*, 2010). Follow-up analysis showed that nearly 18% of transcripts varied  
438 seasonally (Dal Santo *et al.*, 2013). Grapevine leaves also vary tremendously in shape over the growing  
439 season (Chitwood *et al.*, 2015) and are stable over multiple growing seasons; interestingly, the climate of

440 the season in which the leaves were patterned influence aspects of leaf shape (Chitwood *et al.*, 2016,  
441 2020). We confirm that the patterns of variation previously identified in berries are also present in the  
442 leaves, and that patterns of leaf shape seem to be stable across studies.

443 While many studies have uncovered temporal effects on the ionome across years (Baxter *et al.*,  
444 2013; Pauli *et al.*, 2018), variation within a single year or a single growing season remains relatively  
445 unstudied. One example included the joint analysis of the ionome and metabolome in Aleppo pine (*Pinus*  
446 *halepensis*), a perennial system with a bimodal growth habit in both spring and summer, where a suite of  
447 ions more abundant during spring growth were identified while only potassium was more abundant in the  
448 summer (López-Orenes *et al.*, 2018). Other studies profiled tangential effects of the seasonal ionome; for  
449 example, winter-phased cultivars of barley (*Hordeum vulgare*) show differential uptake of nutrients in  
450 comparison to summer-phased cultivars, but the study was primarily targeted to identify genotypic rather  
451 than temporal effects (Thomas *et al.*, 2016). Our data advances these previous studies by identifying the  
452 dynamic nature of ion uptake over the course of a season. More work is needed to understand how  
453 seasonal variation in ion concentrations vary inter-annually, by plant organ, or spatially; similarly,  
454 relationships between ion concentrations in leaves (a proxy for ion uptake) and berry chemistry and wine  
455 quality is another important area of future work.

456

#### 457 *Grafting and rootstock genotype exhibits a complex and subtle signal on most leaf phenotypes*

458 Consistent with previous studies, we confirm that grafting in general, as well as rootstock  
459 genotype, has a complex effect on phenotypic variation in grapevine shoot systems. Most notably, we  
460 show that the rootstock to which a scion is grafted is predictable from ion concentrations in the leaves,  
461 and that this signal is strengthened by inclusion of phenological stage. For example, we previously  
462 showed that nickel concentration was elevated in the rootstock ‘SO4’ (Migicovsky *et al.*, 2019b). At a  
463 similar point in the season, we observe the same pattern, but by harvest, nickel is almost entirely excluded  
464 from the leaf suggesting that the biological implications of this differential uptake could be missed if not  
465 surveyed across the season. We also confirm that rootstock genotype influences the metabolome of  
466 grafted grapevine, in some cases in a season-specific manner. In the transcriptome, PCA was able to  
467 identify dimensions of variation that were significantly described by rootstock and the interaction of  
468 rootstock and time of day, confirming prior observations (Migicovsky *et al.*, 2019a). Moreover,  
469 supervised methodologies identified linear discriminants in the PC space that weakly separated some  
470 rootstock genotypes. However, gene-by-gene analysis (with default p-value correction regimes) finds no  
471 genes modulated by rootstock genotype, or even just from the act of grafting. Finally, of the physiology  
472 traits we measured, leaf transpiration and stomatal conductance were higher in ‘1103P’ in the middle of  
473 the season. Thus the impact of grafting on leaf phenotypic variation varies by phenotype. Regardless, we

474 identify subtle but ubiquitous effects from rootstock genotype on shoot system phenotypes that are often  
475 season-specific.

476         The impact of root genotype on shoot phenotype is a growing area of research, especially in  
477 grapevine. For ‘Cabernet Sauvignon’, grafting increased ion uptake globally and some rootstock  
478 genotypes provide a clear signal in the scion (Lecourt *et al.*, 2015; Gautier *et al.*, 2020b). Also, the  
479 metabolome is a key driver of the formation of the graft junction and some key metabolites could be  
480 responsible for graft incompatibility (Canas *et al.*, 2015). Building on this work, targeted metabolomics  
481 showed two classes of metabolites, flavanols and stilbenes, were differentially abundant at graft junctions  
482 and in the rootstocks of ‘Cabernet Sauvignon’ vines one month after grafting (Prodhomme *et al.*, 2019).  
483 However, flavanols were not differentially abundant in the scion, but scion stilbene concentrations were  
484 apparently controlled by rootstock genotype. The effect of rootstock genotype on the scion transcriptome  
485 is perhaps the most varied. For example, ‘Cabernet Sauvignon’ shoot apical meristems show no effects by  
486 rootstock genotype (Cookson & Ollat, 2013), but berries of the same cultivar do, although the effect is  
487 tempered by seasonal variation (Corso *et al.*, 2016). Variation in ‘Chambourcin’ leaf shape is also driven  
488 by rootstock genotype, especially in conjunction with differences in irrigation (Migicovsky *et al.*, 2019a).  
489 Collectively, these studies all suggest that rootstock genotype influences scion phenotypes, but those  
490 effects will vary by phenotype, scion genotype, and perhaps other experimental conditions. Our results  
491 confirm this suggestion adding that aspects of time are tremendously influential to the observed results  
492 regardless of phenotype.

493

#### 494 *Phenomic covariation warrants work toward latent phenotypes*

495         In the present study, we assess the extent of covariation among leaf phenotypes. For the primary  
496 dimensions of variation in each data type, within-data-type correlations are strong. Correlations also exist  
497 between phenotypes, suggesting room for the analysis of latent phenotypic structure for experimental  
498 questions. For example, aspects of the metabolome are frequently correlated with other data types such as  
499 the transcriptome and aspects of leaf shape. Interestingly, correlations within and between data types are  
500 highly dynamic over a growing season. For example, several correlations with leaf shape were present at  
501 veraison, but were completely missing from anthesis and harvest. We believe this work warrants further  
502 investigation, specifically, by adding data on other phenotypic classes such as lncRNAs (Vitulo *et al.*,  
503 2014; Harris *et al.*, 2017), epigenetics (Williams *et al.*, 2020), and microbiomes (Marasco *et al.*, 2018;  
504 Swift *et al.*, 2020). Much of the work constituting phenomics in grapevine has addressed how berries  
505 develop over the growing season, how cultivars differ from one another, and how the concept of terroir  
506 influences wine (Zamboni *et al.*, 2010; Palumbo *et al.*, 2014; Degu *et al.*, 2014; Anesi *et al.*, 2015; Savoi  
507 *et al.*, 2016, 2017). Despite data integration becoming more popular, there are still many open questions

508 as to what methods are most appropriate and how to most effectively utilize them (reviewed for grapevine  
509 in (Wong & Matus, 2017; Fabres *et al.*, 2017); reviewed broadly in (Huang *et al.*, 2017; Stein-O'Brien *et*  
510 *al.*, 2018). Ongoing work attempts to integrate high-dimensional phenotypic datasets generated within a  
511 single organ system (e.g., leaves); and future studies should expand this to explore phenomic variation in  
512 and among organs, over time, and across space.

513

## 514 **References**

515

## 516 **Figure Legends**

517

518 Figure 1. The ionome shows strong signal from rootstock genotype, leaf position, and phenological stage  
519 **(a)** Percent variation captured in linear models fit to each of 20 ions measured in the ionomics pipeline.  
520 Presence of a cell indicates the model term (top) was significant (FDR;  $p_{\text{adj}} < 0.05$ ) for that ion (left). **(b)**  
521 Example ions shown to vary significantly by the interaction of leaf position and phenological stage.  
522 Boxes are bound by 25th and 75th percentile with whiskers extending 1.5 IQR from the box. **(c)** Example  
523 ions shown to vary significantly by the interaction of rootstock genotype and phenological state. Boxes  
524 are bound by 25th and 75th percentile with whiskers extending 1.5 IQR from the box. **(d)** Standardized  
525 heatmap for out-of-bag (OOB) predictions by a random forest trained to predict rootstock genotype, **(e)**  
526 the interaction between rootstock genotype by phenology, and **(f)** the interaction between rootstock  
527 genotype and leaf position.

528

529 Figure 2. The metabolome is influenced by rootstock genotype, phenological stage, and time of sampling.  
530 **(a)** Percent variation captured in linear models fit to each of the top 20 principal components of the  
531 metabolome (661 measured metabolites). Presence of a cell indicates the model term (top) was significant  
532 for that PC (left, percent variation explained by the PC in parentheses). **(b)** The distribution of projections  
533 onto PC17, the strongest captured rootstock effect in the metabolome. Boxes are bound by the 25th and  
534 75th percentiles with whiskers extending 1.5 IQR from the box. **(c)** Projections of all samples into the  
535 first two dimensions of a linear discriminant space trained to maximize variation between rootstock  
536 genotypes.

537

538 Figure 3. Gene expression primarily responds to time of season and circadian correlates  
539 **(a)** Heatmap showing 500 genes with the highest variance following the filtering of lowly expressed  
540 genes and gene-by-gene variance stabilizing transformations (VST) ordered by example model factors  
541 (below). **(b)** Percent variation captured in linear models fit to the top 100 Principal Components of the



542 VST-transformed gene-expression space. Presence of a cell indicates the model term (top) was significant  
543 for that PC (left, percent variation explained by the PC in parentheses). **(c)** Projections of all samples  
544 projected into the first two dimensions of the linear discriminant space trained to maximize variation  
545 between phenological stages, **(d)** row of the vineyard, and **(e)** rootstock genotype.

546

547 Figure 4. Leaf shape variation is primarily determined by shoot position but changes over the season  
548 **(a)** Representative shapes showing leaf variation (-3 sd, mean, +3 sd) captured in each of the top 4  
549 principal components of the Generalized Procrustes Analysis-rotated leaf shapes. **(b)** Projections of all  
550 leaves into the first two dimensions of principal component space colored by the strongest determinant of  
551 variation in the top two PCs. **(c)** Projections of all leaves into the first two dimensions of a linear  
552 discriminant space trained to maximize variation between phenological stages. **(d)** Variation in leaf shape  
553 captured on PC2 shown by leaf position and phenological stage. Large points represent the mean of the  
554 group when projected onto PC2. Bars surrounding the mean show one standard deviation. Variation in  
555 each group is shown as a composite leaf trace scaled to a standard size and centered over the mean.

556

557 Figure 5. Vine physiology measurements show signal from most experimental manipulation  
558 **(a)** Percent variation explained by model terms (top) from linear models fit to each of four physiology  
559 traits (left). **(b)** Variation in leaf transpiration rate for each rootstock genotype over the course of the  
560 season. Boxes are bound by the 25th and 75th percentiles with whiskers extending 1.5 IQR from the box.  
561 **(c)** Variation in stomatal conductance for each rootstock genotype over the course of the season. Boxes  
562 are bound by the 25th and 75th percentiles with whiskers extending 1.5 IQR from the box.

563

564 Figure 6. Trait covariation varies over the course of the season  
565 Correlation networks showing patterns of covariation within and between phenotyping modalities. Nodes  
566 of the network are connected if they are significantly correlated (Pearson, FDR;  $p_{adj} < 0.05$ ). Edge  
567 thickness is proportional to the strength of correlation (multiplied by 16 for visibility). Edge color reflects  
568 the direction of the correlation where blue edges indicate positive correlations and orange edges indicate  
569 negative correlations. Modalities are indicated by a leading character and node color: ionomics (iPCs;  
570 purple), metabolomics (mPCs; pink), gene expression (gPCs; yellow), leaf shape (sPCs; green). Network  
571 topologies are shown for **(a)** anthesis, **(b)** veraison, and **(c)** harvest.

572

573 Supplemental Figures:

574

575 SFig 1. Patterns of ion covariation change over experimental treatments

576 Correlation networks showing patterns of ion covariation across phenological stages and shoot position.  
577 Nodes of the network are connected if they are significantly correlated (Pearson, FDR;  $p_{adj} < 0.05$ ).  
578 Edge thickness is proportional to the strength of correlation (multiplied by 16 for visibility). Edge color  
579 reflects the direction of the correlation where blue edges indicate positive correlations and orange edges  
580 indicate negative correlations.

581

582 SFig 2. Patterns of variation contributing to gene expression linear discriminants

583 (A) Projections of leaf gene expression samples into the first two dimensions of a linear discriminant  
584 space trained to maximize variation between phenological stages, rows in the vineyard, and rootstock  
585 genotype. For each LD, the PCs that loaded significantly ( $>1.96$  sd from the mean loading) are listed in  
586 order of loading magnitude. (B) Distribution of the top loading PCs onto LD1 and LD2 for each of the  
587 trained models.

588

589 SFig 3. Patterns of variation in leaf are subtle

590 A Percent variation captured in linear models fit to each of the top 20 principal components of leaf  
591 morphology. Presence of a cell indicates the model term (top) was significant for that PC (left, percent  
592 variation explained by the PC in parentheses). (B) Composite leaf traces for the main rootstock genotype  
593 effect identified on PC1.

594

595 SFig 4. Example correlations within and between data modalities over the course of the season

596 (A) Example correlation showing a strong within-modality correlation between the ionomics gPC1 and  
597 gPC2 at anthesis. Pearson correlations by phenological stage and CIs derived from 10000 random 90%  
598 draws are shown for each panel. Generally speaking, CIs overlapping with 0 were not accepted as  
599 significant. (B) Example correlation showing one of the stronger between-modality correlations between  
600 the gene expression gPC4 and morphology (shape) sPC3 at veraison. (C) Example correlation of a  
601 relationship that is present multiple times over the course of the season between metabolomics mPC3 and  
602 gene expression gPC6 at both veraison and harvest. (D) Example correlation that is dynamic over the  
603 course of the growing season between the ionomics mPC3 and mPC6.

604

605 Data Availability:

606 Ionomics data are available at [10.6084/m9.figshare.13200980](https://figshare.com/10.6084/m9.figshare.13200980). Metabolomics data are available at  
607 [10.6084/m9.figshare.13201043](https://figshare.com/10.6084/m9.figshare.13201043). Gene expression data are available in the Sequence Read Archive under  
608 BioProject PRJNA674915. Leaf scans and leaf landmarks are available at [10.6084/m9.figshare.13200953](https://figshare.com/10.6084/m9.figshare.13200953).

609 Weather and physiology data are available at 10.6084/m9.figshare.13198682 and  
610 10.6084/m9.figshare.13201016, respectively.

611

612 Code Availability:

613 All code for this paper including shell scripts for RNAseq analysis and Jupyter Notebooks for data  
614 analysis in R can be found on the Vitis Underground GitHub  
615 ([https://github.com/PGRP1546869/mt\\_vernon\\_2017\\_leaf](https://github.com/PGRP1546869/mt_vernon_2017_leaf)).

616

617 Author Contributions:

618 AJM, DHC, AF, LGK, MK, JPL, and QM designed the experiment. ZNH, LLK, MA, JFS, ZM, NB, EF,  
619 and JPL contributed to sample collection and sample processing. ZNH, LLK, JFS, and MA contributed to  
620 data analysis. ZNH and AJM contributed to the writing of the manuscript. All authors contributed to  
621 manuscript editing.

622

623 Acknowledgments:

624 This work was funded by the National Science Foundation Plant Genome Research Project 1546869. We  
625 thank members of the Miller lab at Saint Louis University and the Donald Danforth Plant Science Center,  
626 members of the Kovacs Lab at Missouri State University, members of the Kwasniewski Lab at the  
627 University of Missouri, and members Londo Lab at the USDA-ARS Grape Research Unit for vineyard  
628 sampling and sample processing. We express special thanks to Matthew Rubin and Elizabeth Kellogg at  
629 the Donald Danforth Plant Science Center for statistical wisdom and valuable comments on the  
630 manuscript.

631

632

633 **References:**

634 **Anders S, Huber W. 2010.** Differential expression analysis for sequence count data. *Genome biology* **11**:  
635 R106.

636 **Anders S, Pyl PT, Huber W. 2010.** HTSeq: Analysing high-throughput sequencing data with Python.

637 **Anesi A, Stocchero M, Dal Santo S, Commisso M, Zenoni S, Ceoldo S, Tornielli GB, Siebert TE,**  
638 **Herderich M, Pezzotti M, et al. 2015.** Towards a scientific interpretation of the terroir concept: plasticity  
639 of the grape berry metabolome. *BMC plant biology* **15**: 191.

640 **Bavaresco L, Lovisolo C. 2015.** Effect of grafting on grapevine chlorosis and hydraulic conductivity.  
641 *VITIS-Journal of Grapevine Research*.

- 642 **Baxter I.** 2010. Ionomics: The functional genomics of elements. *Briefings in functional genomics* **9**: 149–  
643 156.
- 644 **Baxter IR, Gustin JL, Settles AM, Hoekenga OA.** 2013. Ionomics characterization of maize kernels in  
645 the intermated B73× Mo17 population. *Crop science* **53**: 208–220.
- 646 **Berdeja M, Nicolas P, Kappel C, Dai ZW, Hilbert G, Peccoux A, Lafontaine M, Ollat N, Gomès E,  
647 Delrot S.** 2015. Water limitation and rootstock genotype interact to alter grape berry metabolism through  
648 transcriptome reprogramming. *Horticulture research* **2**: 15012.
- 649 **Bolger AM, Lohse M, Usadel B.** 2014. Trimmomatic: a flexible trimmer for Illumina sequence data.  
650 *Bioinformatics* **30**: 2114–2120.
- 651 **Bushnell B.** 2017. BBTools software package. URL <http://sourceforge.net/projects/bbmap>.
- 652 **Canaguier A, Grimplet J, Di Gaspero G, Scalabrin S, Duchêne E, Choisine N, Mohellibi N,  
653 Guichard C, Rombauts S, Le Clainche I, et al.** 2017. A new version of the grapevine reference genome  
654 assembly (12X.v2) and of its annotation (VCost.v3). *Genomics data* **14**: 56–62.
- 655 **Canas S, Assunção M, Brazão J, Zanol G, Eiras-Dias JE.** 2015. Phenolic compounds involved in  
656 grafting incompatibility of *Vitis* spp: development and validation of an analytical method for their  
657 quantification. *Phytochemical analysis: PCA* **26**: 1–7.
- 658 **Chitarra W, Perrone I, Avanzato CG, Minio A, Boccacci P, Santini D, Gilardi G, Siciliano I,  
659 Gullino ML, Delledonne M, et al.** 2017. Grapevine Grafting: Scion Transcript Profiling and Defense-  
660 Related Metabolites Induced by Rootstocks. *Frontiers in plant science* **8**.
- 661 **Chitwood DH, Klein LL, O’Hanlon R, Chacko S, Greg M, Kitchen C, Miller AJ, Londo JP.** 2015.  
662 Latent developmental and evolutionary shapes embedded within the grapevine leaf. *New Phytologist* **210**:  
663 343–355.
- 664 **Chitwood DH, Mullins J, Migicovsky Z, Frank M, VanBuren R, Londo JP.** 2020. Vein-to-blade ratio  
665 is an allometric indicator of climate-induced changes in grapevine leaf size and shape. *bioRxiv*:  
666 2020.05.20.106906.
- 667 **Chitwood DH, Ranjan A, Martinez CC, Headland LR, Thiem T, Kumar R, Covington MF, Hatcher  
668 T, Naylor DT, Zimmerman S, et al.** 2014. A modern ampelography: a genetic basis for leaf shape and  
669 venation patterning in grape. *Plant physiology* **164**: 259–272.
- 670 **Chitwood DH, Rundell SM, Li DY, Woodford QL, Yu TT, Lopez JR, Greenblatt D, Kang J, Londo  
671 JP.** 2016. Climate and Developmental Plasticity: Interannual Variability in Grapevine Leaf Morphology.  
672 *Plant physiology* **170**: 1480–1491.
- 673 **Cookson SJ, Ollat N.** 2013. Grafting with rootstocks induces extensive transcriptional re-programming  
674 in the shoot apical meristem of grapevine. *BMC plant biology* **13**: 147.
- 675 **Corso M, Vannozzi A, Ziliotto F, Zouine M, Maza E, Nicolato T, Vitulo N, Meggio F, Valle G,  
676 Bouzayen M, et al.** 2016. Grapevine Rootstocks Differentially Affect the Rate of Ripening and Modulate  
677 Auxin-Related Genes in Cabernet Sauvignon Berries. *Frontiers in plant science* **7**: 69.
- 678 **Csardi G, Nepusz T, Others.** 2006. The igraph software package for complex network research.

- 679 *InterJournal, complex systems* **1695**: 1–9.
- 680 **Cuadros-Inostroza A, Ruíz-Lara S, González E, Eckardt A, Willmitzer L, Peña-Cortés H. 2016.**  
681 GC-MS metabolic profiling of Cabernet Sauvignon and Merlot cultivars during grapevine berry  
682 development and network analysis reveals a stage- and cultivar-dependent connectivity of primary  
683 metabolites. *Metabolomics: Official journal of the Metabolomic Society* **12**: 39.
- 684 **Dal Santo S, Fasoli M, Negri S, D’Inca E, Vicenzi N, Guzzo F, Tornielli GB, Pezzotti M, Zenoni S.**  
685 **2016.** Plasticity of the Berry Ripening Program in a White Grape Variety. *Frontiers in plant science* **7**:  
686 970.
- 687 **Dal Santo S, Tornielli GB, Zenoni S, Fasoli M, Farina L, Anesi A, Guzzo F, Delledonne M, Pezzotti**  
688 **M. 2013.** The plasticity of the grapevine berry transcriptome. *Genome biology* **14**: r54.
- 689 **Degu A, Hochberg U, Sikron N, Venturini L, Buson G, Ghan R, Plaschkes I, Batushansky A,**  
690 **Chalifa-Caspi V, Mattivi F, et al. 2014.** Metabolite and transcript profiling of berry skin during fruit  
691 development elucidates differential regulation between Cabernet Sauvignon and Shiraz cultivars at  
692 branching points in the polyphenol pathway. *BMC plant biology* **14**: 188.
- 693 **Dobin A, Davis CA, Schlesinger F, Drenkow J, Zaleski C, Jha S, Batut P, Chaisson M, Gingeras**  
694 **TR. 2013.** STAR: ultrafast universal RNA-seq aligner. *Bioinformatics* **29**: 15–21.
- 695 **Dryden IL, Mardia KV. 2016.** *Statistical Shape Analysis: With Applications in R*. John Wiley & Sons.
- 696 **Fabres PJ, Collins C, Cavagnaro TR, Rodríguez López CM. 2017.** A Concise Review on Multi-Omics  
697 Data Integration for Terroir Analysis in *Vitis vinifera*. *Frontiers in plant science* **8**: 1065.
- 698 **Ferlito F, Distefano G, Gentile A, Allegra M, Lakso AN, Nicolosi E. 2020.** Scion–rootstock  
699 interactions influence the growth and behaviour of the grapevine root system in a heavy clay soil.  
700 *Australian Journal of Grape and Wine Research* **26**: 68–78.
- 701 **Fox J, Friendly M, Weisberg S. 2013.** Hypothesis tests for multivariate linear models using the car  
702 package. *The R journal* **5**: 39–52.
- 703 **Galet P. 1979.** *A Practical Ampelography: Grapevine Identification*. Comstock Pub. Associates.
- 704 **Gautier A, Cookson SJ, Lagalle L, Ollat N, Marguerit E. 2020a.** Influence of the three main genetic  
705 backgrounds of grapevine rootstocks on petiolar nutrient concentrations of the scion, with a focus on  
706 phosphorus. *OENO One* **54**: 1–13.
- 707 **Gautier A, Cookson SJ, Lagalle L, Ollat N, Marguerit E. 2020b.** Influence of the three main genetic  
708 backgrounds of grapevine rootstocks on petiolar nutrient concentrations of the scion, with a focus on  
709 phosphorus. *OENO One* **54**: 1–13.
- 710 **Gehan MA, Fahlgren N, Abbasi A, Berry JC, Callen ST, Chavez L, Doust AN, Feldman MJ,**  
711 **Gilbert KB, Hodge JG, et al. 2017.** PlantCV v2: Image analysis software for high-throughput plant  
712 phenotyping. *PeerJ* **5**: e4088.
- 713 **Grimes DW, Williams LE. 1990.** Irrigation Effects on Plant Water Relations and Productivity of  
714 Thompson Seedless Grapevines. *Crop science* **30**: 255.

- 715 **Harris ZN, Kovacs LG, Londo JP. 2017.** RNA-seq-based genome annotation and identification of long-  
716 noncoding RNAs in the grapevine cultivar ‘Riesling’. *BMC genomics* **18**: 937.
- 717 **Houle D, Govindaraju DR, Omholt S. 2010.** Phenomics: the next challenge. *Nature reviews. Genetics*  
718 **11**: 855–866.
- 719 **Huang S, Chaudhary K, Garmire LX. 2017.** More Is Better: Recent Progress in Multi-Omics Data  
720 Integration Methods. *Frontiers in genetics* **8**: 84.
- 721 **Islam MN, Downey F, Ng CKY. 2011.** Comparative analysis of bioactive phytochemicals from  
722 *Scutellaria baicalensis*, *Scutellaria lateriflora*, *Scutellaria racemosa*, *Scutellaria tomentosa* and *Scutellaria*  
723 *wrightii* by LC-DAD-MS. *Metabolomics: Official journal of the Metabolomic Society* **7**: 446–453.
- 724 **Jaillon O, Aury J-M, Noel B, Policriti A, Clepet C, Casagrande A, Choisne N, Aubourg S, Vitulo N,**  
725 **Jubin C, et al. 2007.** The grapevine genome sequence suggests ancestral hexaploidization in major  
726 angiosperm phyla. *Nature* **449**: 463–467.
- 727 **Klein LL, Caito M, Chapnick C, Kitchen C, O’Hanlon R, Chitwood DH, Miller AJ. 2017.** Digital  
728 Morphometrics of Two North American Grapevines (*Vitis*: Vitaceae) Quantifies Leaf Variation between  
729 Species, within Species, and among Individuals. *Frontiers in plant science* **8**: 373.
- 730 **Kuhn M. 2013.** Predictive Modeling with R and the caret Package. *Google Scholar*.
- 731 **Lecourt J, Lauvergeat V, Ollat N, Vivin P, Cookson SJ. 2015.** Shoot and root ionome responses to  
732 nitrate supply in grafted grapevines are rootstock genotype dependent: Rootstock and nitrogen supply  
733 affect grapevine ionome. *Australian journal of grape and wine research* **21**: 311–318.
- 734 **Lenth R, Singmann H, Love J, Others. 2018.** Emmeans: Estimated marginal means, aka least-squares  
735 means. *R package version 1*.
- 736 **Liaw A, Wiener M, Others. 2002.** Classification and regression by randomForest. *R news* **2**: 18–22.
- 737 **López-Orenes A, Bueso MC, Conesa H, Calderón AA, Ferrer MA. 2018.** Seasonal ionic and  
738 metabolic changes in Aleppo pines growing on mine tailings under Mediterranean semi-arid climate. *The*  
739 *Science of the total environment* **637-638**: 625–635.
- 740 **Love MI, Huber W, Anders S. 2014.** Moderated estimation of fold change and dispersion for RNA-seq  
741 data with DESeq2. *Genome biology* **15**: 550.
- 742 **Marasco R, Rolli E, Fusi M, Michoud G, Daffonchio D. 2018.** Grapevine rootstocks shape  
743 underground bacterial microbiome and networking but not potential functionality. *Microbiome* **6**: 3.
- 744 **Migicovsky Z, Harris ZN, Klein LL, Li M, McDermaid A, Chitwood DH, Fennell A, Kovacs LG,**  
745 **Kwasniewski M, Londo JP, et al. 2019a.** Rootstock effects on scion phenotypes in a ‘Chambourcin’  
746 experimental vineyard. *Horticulture Research* **6**: 1–13.
- 747 **Mudge K, Janick J, Scofield S, Goldschmidt EE. 2009.** A History of Grafting. In: Janick J, ed. CIBA-  
748 GEIGY Agrochemicals Tech. Monog. Horticultural Reviews. Hoboken, NJ, USA: John Wiley & Sons,  
749 Inc., 437–493.
- 750 **Mullins MG, Bouquet A, Williams LE. 1992.** *Biology of the Grapevine*. Cambridge University Press.

- 751 **Oliver SG, Winson MK, Kell DB, Baganz F. 1998.** Systematic functional analysis of the yeast genome.  
752 *Trends in biotechnology* **16**: 373–378.
- 753 **Palumbo MC, Zenoni S, Fasoli M, Massonnet M, Farina L, Castiglione F, Pezzotti M, Paci P. 2014.**  
754 Integrated network analysis identifies fight-club nodes as a class of hubs encompassing key putative  
755 switch genes that induce major transcriptome reprogramming during grapevine development. *The Plant*  
756 *cell* **26**: 4617–4635.
- 757 **Pauli D, Ziegler G, Ren M, Jenks MA, Hunsaker DJ, Zhang M, Baxter I, Gore MA. 2018.**  
758 Multivariate Analysis of the Cotton Seed Ionome Reveals a Shared Genetic Architecture. *G3* **8**: 1147–  
759 1160.
- 760 **Pouget R. 1990.** Histoire de la lutte contre le phylloxéra de la vigne en France: 1868-1895. *Histoire des*  
761 *sciences médicales*.
- 762 **Prodhomme D, Valls Fonayet J, Hévin C, Franc C, Hilbert G, de Revel G, Richard T, Ollat N,**  
763 **Cookson SJ. 2019.** Metabolite profiling during graft union formation reveals the reprogramming of  
764 primary metabolism and the induction of stilbene synthesis at the graft interface in grapevine. *BMC plant*  
765 *biology* **19**: 599.
- 766 **R Core Team. 2013.** R: A language and environment for statistical computing.
- 767 **Ripley BD. 2002.** *Modern applied statistics with S*. Springer.
- 768 **Salt DE, Baxter I, Lahner B. 2008.** Ionomics and the study of the plant ionome. *Annual review of plant*  
769 *biology* **59**: 709–733.
- 770 **Savoi S, Wong DCJ, Arapitsas P, Miculan M, Bucchetti B, Peterlunger E, Fait A, Mattivi F,**  
771 **Castellarin SD. 2016.** Transcriptome and metabolite profiling reveals that prolonged drought modulates  
772 the phenylpropanoid and terpenoid pathway in white grapes (*Vitis vinifera* L.). *BMC plant biology* **16**: 67.
- 773 **Savoi S, Wong DCJ, Degu A, Herrera JC, Bucchetti B, Peterlunger E, Fait A, Mattivi F, Castellarin**  
774 **SD. 2017.** Multi-Omics and Integrated Network Analyses Reveal New Insights into the Systems  
775 Relationships between Metabolites, Structural Genes, and Transcriptional Regulators in Developing  
776 Grape Berries (*Vitis vinifera* L.) Exposed to Water Deficit. *Frontiers in plant science* **8**: 1124.
- 777 **Soulé M. 1967.** PHENETICS OF NATURAL POPULATIONS I. PHENETIC RELATIONSHIPS OF  
778 INSULAR POPULATIONS OF THE SIDE-BLOTCHED LIZARD. *Evolution; international journal of*  
779 *organic evolution* **21**: 584–591.
- 780 **Stein-O'Brien GL, Arora R, Culhane AC, Favorov AV, Garmire LX, Greene CS, Goff LA, Li Y,**  
781 **Ngom A, Ochs MF, et al. 2018.** Enter the Matrix: Factorization Uncovers Knowledge from Omics.  
782 *Trends in genetics: TIG* **34**: 790–805.
- 783 **Swift JF, Hall ME, Harris ZN, Kwasniewski MT, Miller AJ. 2020.** Grapevine microbiota reflect  
784 diversity among compartments and complex interactions within and among root and shoot systems.  
785 *BioRxiv*.
- 786 **Tandonnet S, Torres TT. 2017.** Traditional versus 3' RNA-seq in a non-model species. *Genomics data*  
787 **11**: 9–16.

- 788 **Tautenhahn R, Patti GJ, Rinehart D, Siuzdak G. 2012.** XCMS Online: a web-based platform to  
789 process untargeted metabolomic data. *Analytical chemistry* **84**: 5035–5039.
- 790 **Team RC, Others. 2013.** R foundation for statistical computing. *Vienna, Austria* **3**.
- 791 **Thomas CL, Alcock TD, Graham NS, Hayden R, Matterson S, Wilson L, Young SD, Dupuy LX,**  
792 **White PJ, Hammond JP, et al. 2016.** Root morphology and seed and leaf ionic traits in a *Brassica*  
793 *napus* L. diversity panel show wide phenotypic variation and are characteristic of crop habit. *BMC plant*  
794 *biology* **16**: 214.
- 795 **Tramontini S, Vitali M, Centioni L, Schubert A, Lovisolo C. 2013.** Rootstock control of scion  
796 response to water stress in grapevine. *Environmental and Experimental Botany* **93**: 20–26.
- 797 **Tweeddale H, Notley-McRobb L, Ferenci T. 1998.** Effect of slow growth on metabolism of *Escherichia*  
798 *coli*, as revealed by global metabolite pool (‘metabolome’) analysis. *Journal of bacteriology* **180**: 5109–  
799 5116.
- 800 **Ubbens J, Cieslak M, Prusinkiewicz P, Stavness I. 2020.** Latent Space Phenotyping: Automatic Image-  
801 Based Phenotyping for Treatment Studies.
- 802 **Ubbens JR, Stavness I. 2017.** Deep Plant Phenomics: A Deep Learning Platform for Complex Plant  
803 Phenotyping Tasks. *Frontiers in plant science* **8**: 1190.
- 804 **Vitulo N, Forcato C, Carpinelli EC, Telatin A, Campagna D, D’Angelo M, Zimbello R, Corso M,**  
805 **Vannozzi A, Bonghi C, et al. 2014.** A deep survey of alternative splicing in grape reveals changes in the  
806 splicing machinery related to tissue, stress condition and genotype. *BMC plant biology* **14**: 99.
- 807 **Walker MA, Lund K, Agüero C, Riaz S, Fort K, Heinitz C, Romero N. 2014.** BREEDING GRAPE  
808 ROOTSTOCKS FOR RESISTANCE TO PHYLLOXERA AND NEMATODES - IT’S NOT ALWAYS  
809 EASY. *Acta Horticulturae*: 89–97.
- 810 **Warschefsky EJ, Klein LL, Frank MH, Chitwood DH, Londo JP, von Wettberg EJB, Miller AJ.**  
811 **2016.** Rootstocks: Diversity, Domestication, and Impacts on Shoot Phenotypes. *Trends in plant science*  
812 **21**: 418–437.
- 813 **Wickham H. 2016.** *ggplot2: Elegant Graphics for Data Analysis*. Springer.
- 814 **Williams BR, Edwards CE, Kwasniewski MT, Miller AJ. 2020.** Epigenomic patterns reflect irrigation  
815 and grafting in the grapevine clone ‘Chambourcin’. *bioRxiv*.
- 816 **Williams LE, Grimes DW. 1987.** Modelling vine growth-development of a data set for a water balance  
817 subroutine. In: Proceedings of the Sixth Australian Wine Industry Technical Conference. 169–174.
- 818 **Wong DCJ, Matus JT. 2017.** Constructing Integrated Networks for Identifying New Secondary  
819 Metabolic Pathway Regulators in Grapevine: Recent Applications and Future Opportunities. *Frontiers in*  
820 *plant science* **8**: 505.
- 821 **Zamboni A, Di Carli M, Guzzo F, Stocchero M, Zenoni S, Ferrarini A, Tononi P, Toffali K,**  
822 **Desiderio A, Lilley KS, et al. 2010.** Identification of putative stage-specific grapevine berry biomarkers  
823 and omics data integration into networks. *Plant physiology* **154**: 1439–1459.



824 **Ziegler G, Terauchi A, Becker A, Armstrong P, Hudson K, Baxter I. 2013.** Ionomic Screening of  
825 Field-Grown Soybean Identifies Mutants with Altered Seed Elemental Composition. *The Plant Genome*  
826 **6:** lantgenome2012.07.0012.

827 **Zombardo A, Crosatti C, Bagnaresi P, Bassolino L, Reshef N, Puccioni S, Faccioli P, Tafuri A,**  
828 **Delledonne M, Fait A, et al. 2020.** Transcriptomic and biochemical investigations support the role of  
829 rootstock-scion interaction in grapevine berry quality. *BMC genomics* **21:** 468.

830

831

832

833

834

835

836

837

838

839

840

841

842

843

844

845

846

847

848

849

850

851

852

853

854

855

856

857

858 Figure 1: The ionome shows strong signal from rootstock genotype, leaf position, and phenological stage  
 859 **(a)** Percent variation captured in linear models fit to each of 20 ions measured in the ionomics pipeline.  
 860 Presence of a cell indicates the model term (top) was significant (FDR;  $p_{adj} < 0.05$ ) for that ion (left). **(b)**  
 861 Example ions shown to vary significantly by the interaction of leaf position and phenological stage.  
 862 Boxes are bound by 25th and 75th percentile with whiskers extending 1.5 IQR from the box. **(c)** Example  
 863 ions shown to vary significantly by the interaction of rootstock genotype and phenological state. Boxes  
 864 are bound by 25th and 75th percentile with whiskers extending 1.5 IQR from the box. **(d)** Standardized  
 865 heatmap for out-of-bag (OOB) predictions by a random forest trained to predict rootstock genotype, **(e)**  
 866 the interaction between rootstock genotype by phenology, and **(f)** the interaction between rootstock  
 867 genotype and leaf position.  
 868

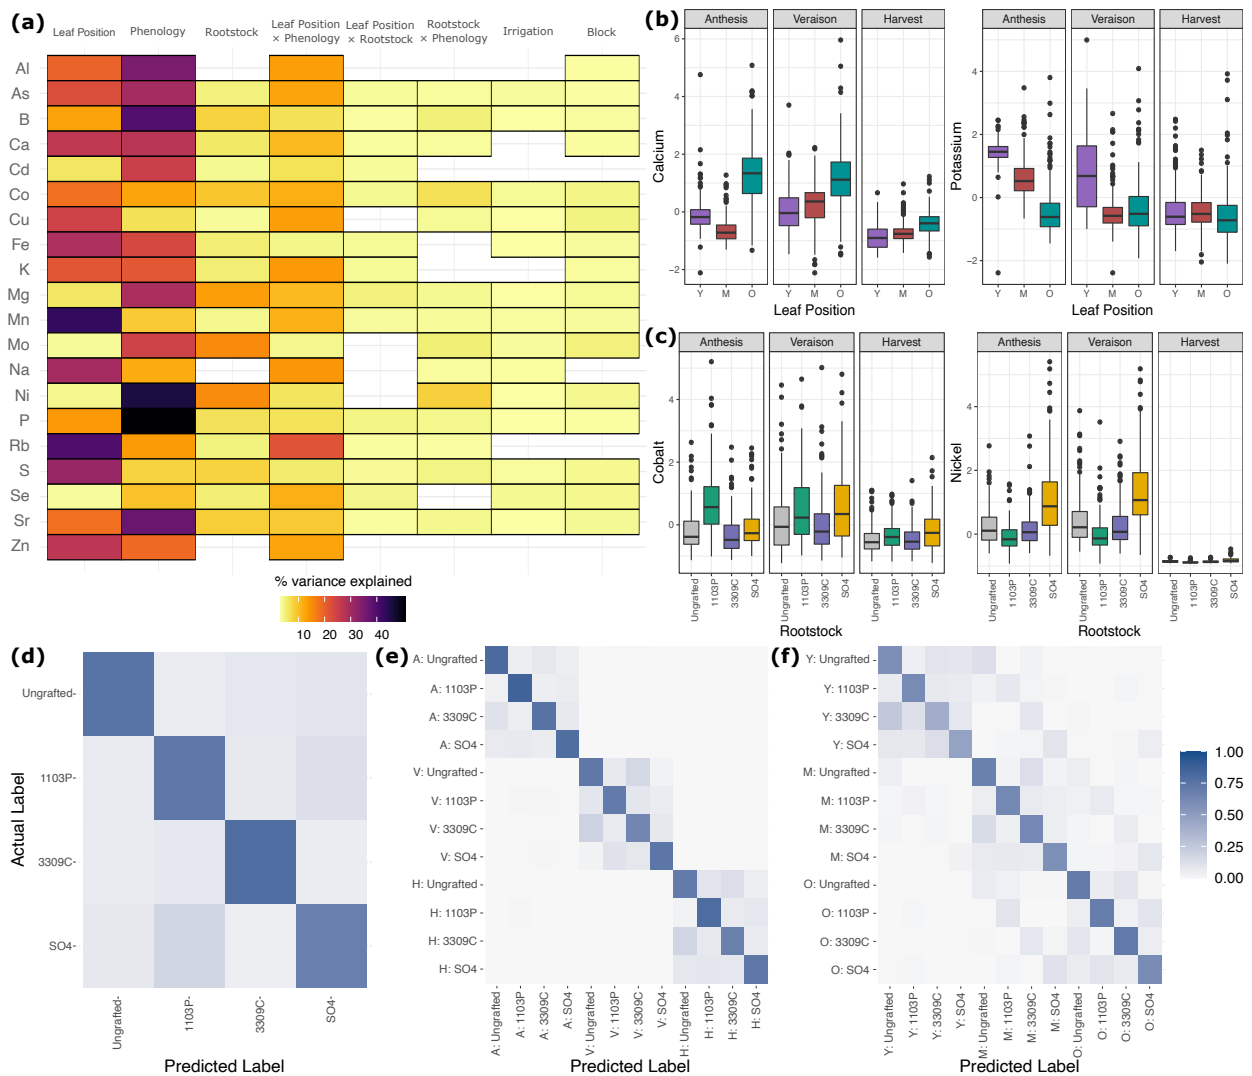

869

870

871 Figure 2: The metabolome is influenced by rootstock genotype, phenological stage, and time of sampling.  
872 **(a)** Percent variation captured in linear models fit to each of the top 20 principal components of the  
873 metabolome (661 measured metabolites). Presence of a cell indicates the model term (top) was significant  
874 for that PC (left, percent variation explained by the PC in parentheses). **(b)** The distribution of projections  
875 onto PC17, the strongest captured rootstock effect in the metabolome. Boxes are bound by the 25th and  
876 75th percentiles with whiskers extending 1.5 IQR from the box. **(c)** Projections of all samples into the  
877 first two dimensions of a linear discriminant space trained to maximize variation between rootstock  
878 genotypes.  
879

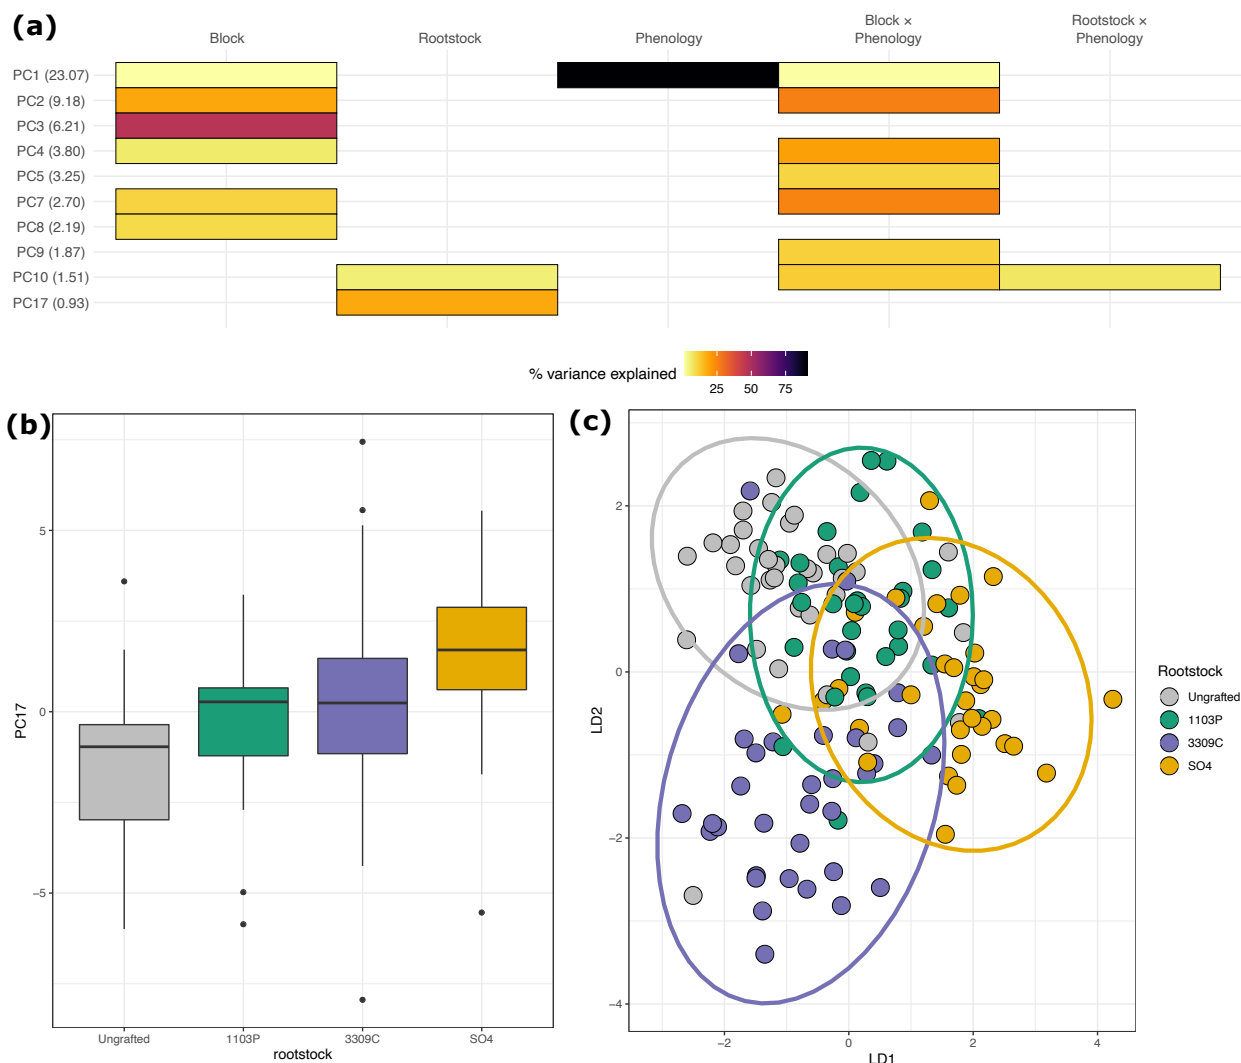

880

881

882

883 Figure 3: Gene expression primarily responds to time of season and circadian correlates  
 884 **(a)** Heatmap showing 500 genes with the highest variance following the filtering of lowly expressed  
 885 genes and gene-by-gene variance stabilizing transformations (VST) ordered by example model factors  
 886 (below). **(b)** Percent variation captured in linear models fit to the top 100 Principal Components of the  
 887 VST-transformed gene-expression space. Presence of a cell indicates the model term (top) was significant  
 888 for that PC (left, percent variation explained by the PC in parentheses). **(c)** Projections of all samples  
 889 projected into the first two dimensions of the linear discriminant space trained to maximize variation  
 890 between phenological stages, **(d)** row of the vineyard, and **(e)** rootstock genotype.

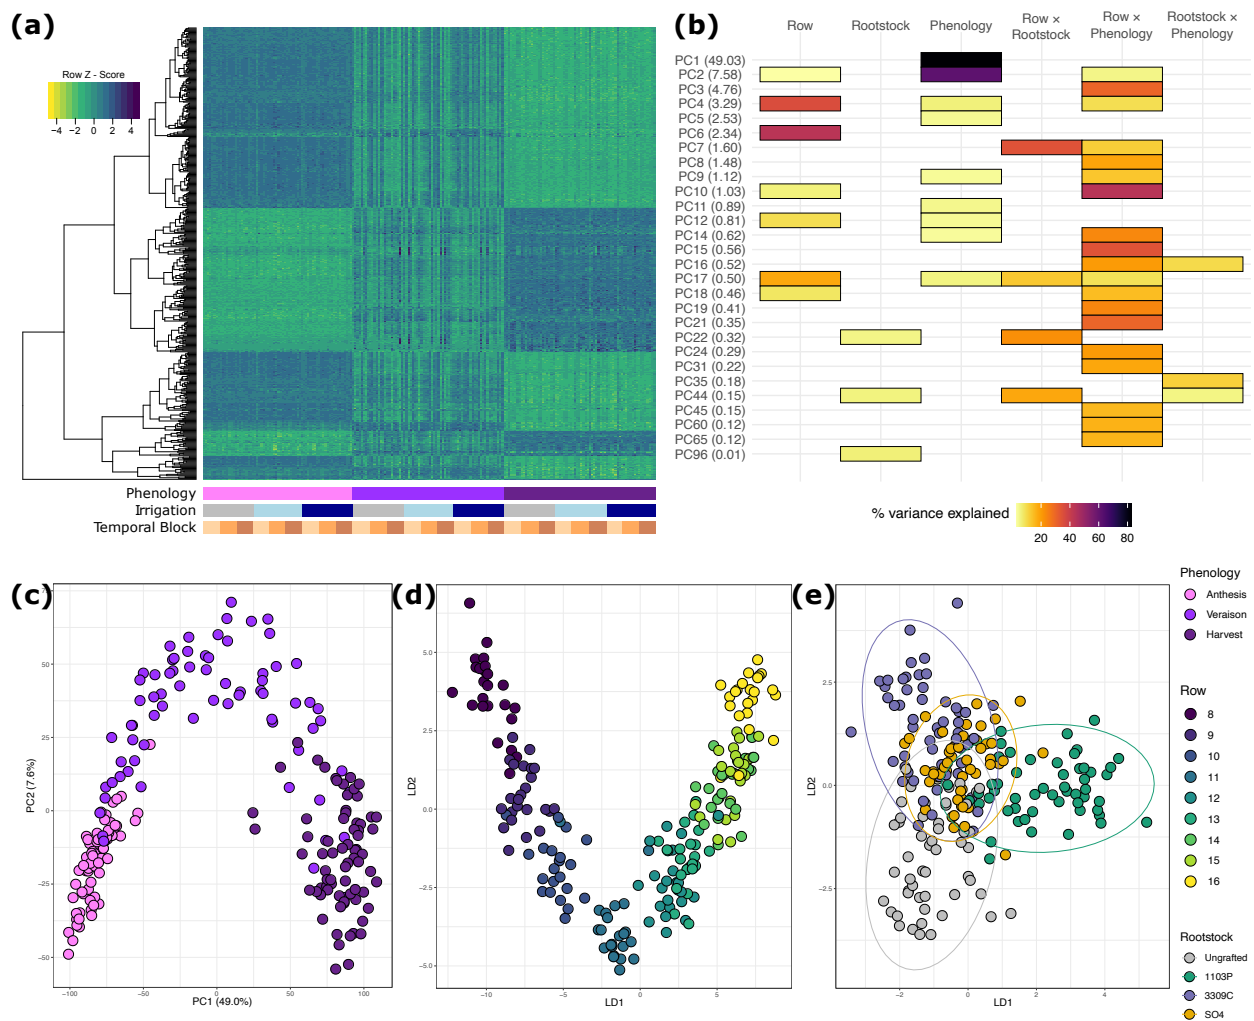

892

893

894

895

896 Figure 4: Leaf shape variation is primarily determined by shoot position but changes over the season  
897 **(a)** Representative shapes showing leaf variation (-3 sd, mean, +3 sd) captured in each of the top 4  
898 principal components of the Generalized Procrustes Analysis-rotated leaf shapes. **(b)** Projections of all  
899 leaves into the first two dimensions of principal component space colored by the strongest determinant of  
900 variation in the top two PCs. **(c)** Projections of all leaves into the first two dimensions of a linear  
901 discriminant space trained to maximize variation between phenological stages. **(d)** Variation in leaf shape  
902 captured on PC2 shown by leaf position and phenological stage. Large points represent the mean of the  
903 group when projected onto PC2. Bars surrounding the mean show one standard deviation. Variation in  
904 each group is shown as a composite leaf trace scaled to a standard size and centered over the mean.  
905

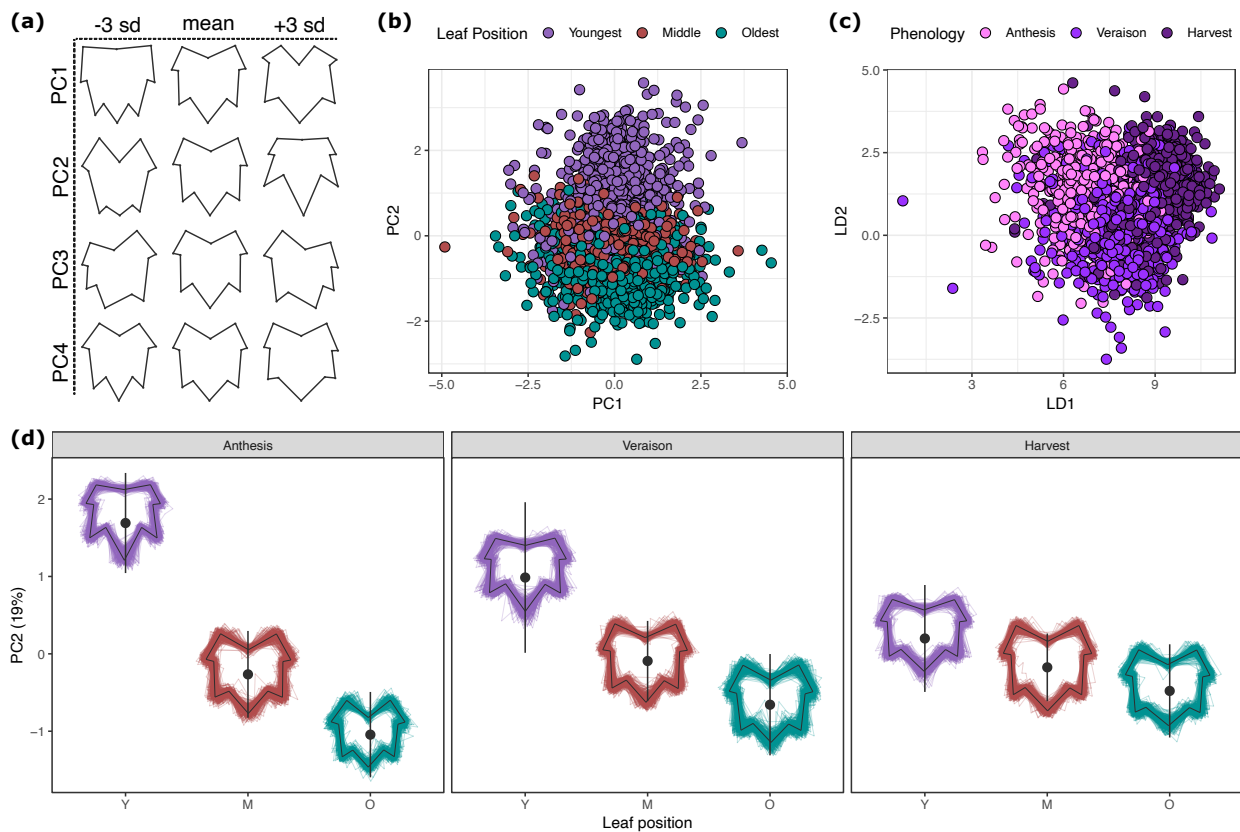

906

907

908

909

910

911

912 Figure 5: Vine physiology measurements show signal from most experimental manipulation  
 913 **(a)** Percent variation explained by model terms (top) from linear models fit to each of four physiology  
 914 traits (left). **(b)** Variation in leaf transpiration rate for each rootstock genotype over the course of the  
 915 season. Boxes are bound by the 25th and 75th percentiles with whiskers extending 1.5 IQR from the box.  
 916 **(c)** Variation in stomatal conductance for each rootstock genotype over the course of the season. Boxes  
 917 are bound by the 25th and 75th percentiles with whiskers extending 1.5 IQR from the box.  
 918

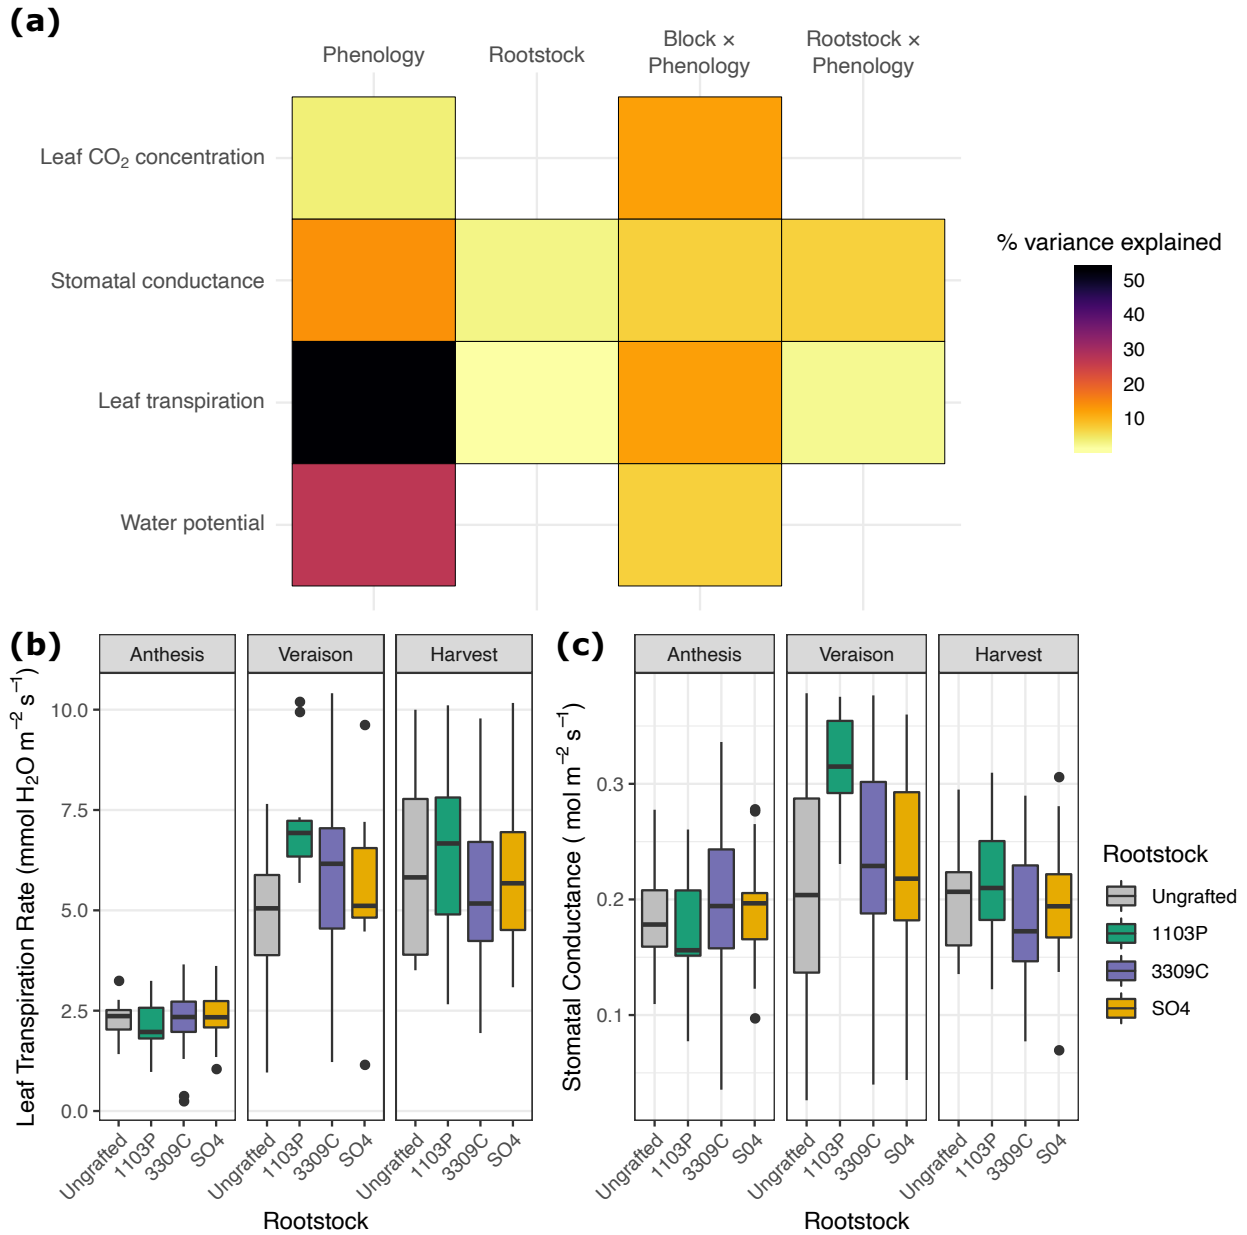

919

920

921 Figure 6: Trait covariation varies over the course of the season  
922 Correlation networks showing patterns of covariation within and between phenotyping modalities. Nodes  
923 of the network are connected if they are significantly correlated (Pearson, FDR;  $p_{\text{adj}} < 0.05$ ). Edge  
924 thickness is proportional to the strength of correlation (multiplied by 16 for visibility). Edge color reflects  
925 the direction of the correlation where blue edges indicate positive correlations and orange edges indicate  
926 negative correlations. Modalities are indicated by a leading character and node color: ionomics (iPCs;  
927 purple), metabolomics (mPCs; pink), gene expression (gPCs; yellow), leaf shape (sPCs; green). Network  
928 topologies are shown for (a) anthesis, (b) veraison, and (c) harvest.  
929

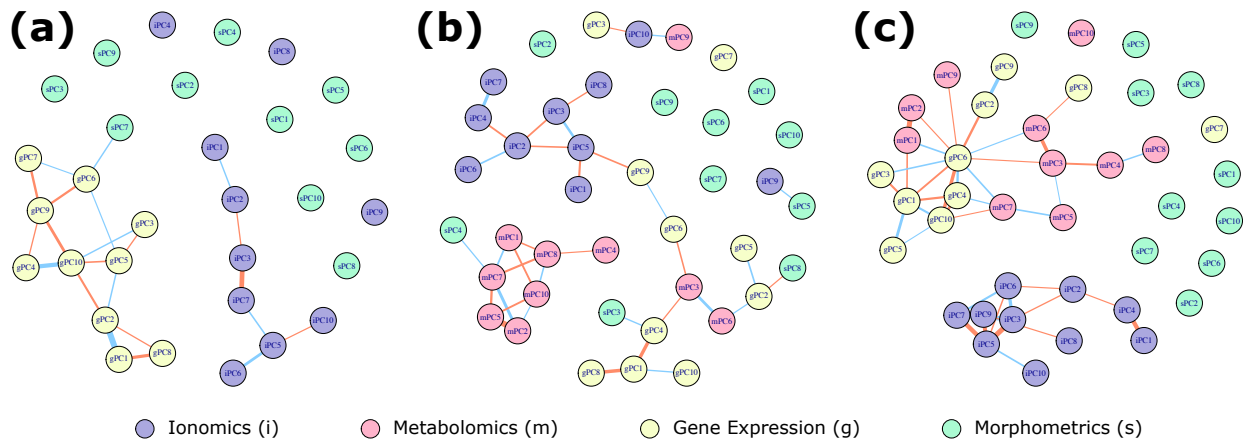

930

931

932

933

934

935

936

937

938

939

940

941

942





956

957 Supp Figure 2: Patterns of variation contributing to gene expression linear discriminants

958 (A) Projections of leaf gene expression samples into the first two dimensions of a linear discriminant  
 959 space trained to maximize variation between phenological stages, rows in the vineyard, and rootstock  
 960 genotype. For each LD, the PCs that loaded significantly ( $>1.96$  sd from the mean loading)  
 961 order of loading magnitude. (B) Distribution of the top loading PCs onto LD1 and LD2 for each of the  
 962 trained models.  
 963

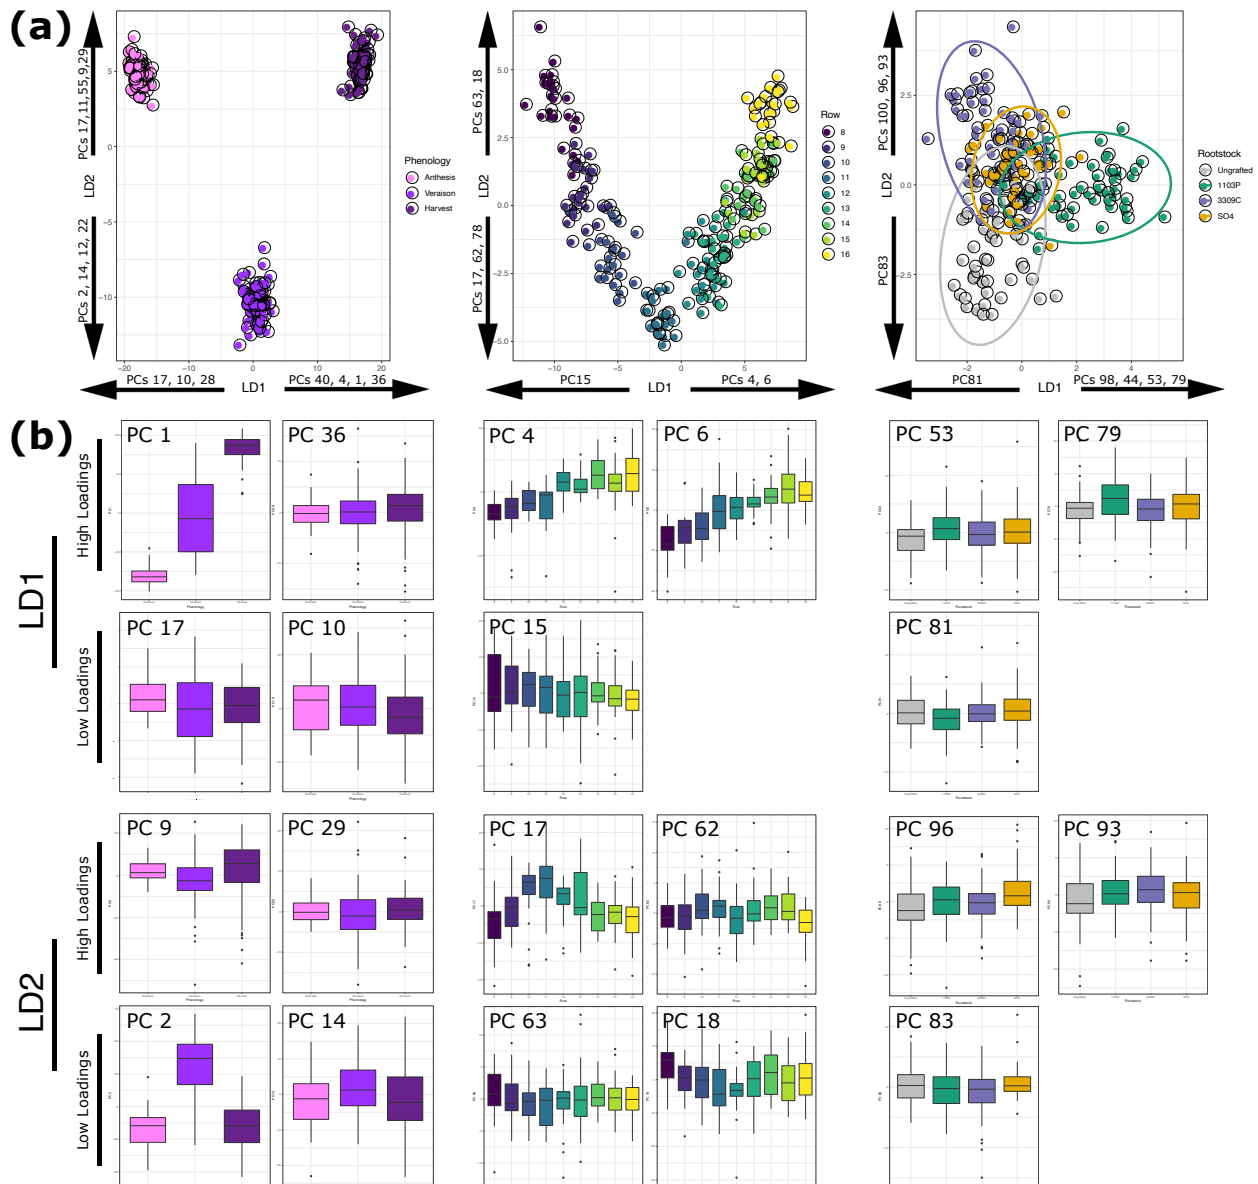

964

965

966 Supp Figure 3: Patterns of variation in leaf are subtle

967 A Percent variation captured in linear models fit to each of the top 20 principal components of leaf

968 morphology. Presence of a cell indicates the model term (top) was significant for that PC (left, percent

969 variation explained by the PC in parentheses). (B) Composite leaf traces for the main rootstock genotype

970 effect identified on PC1.

971

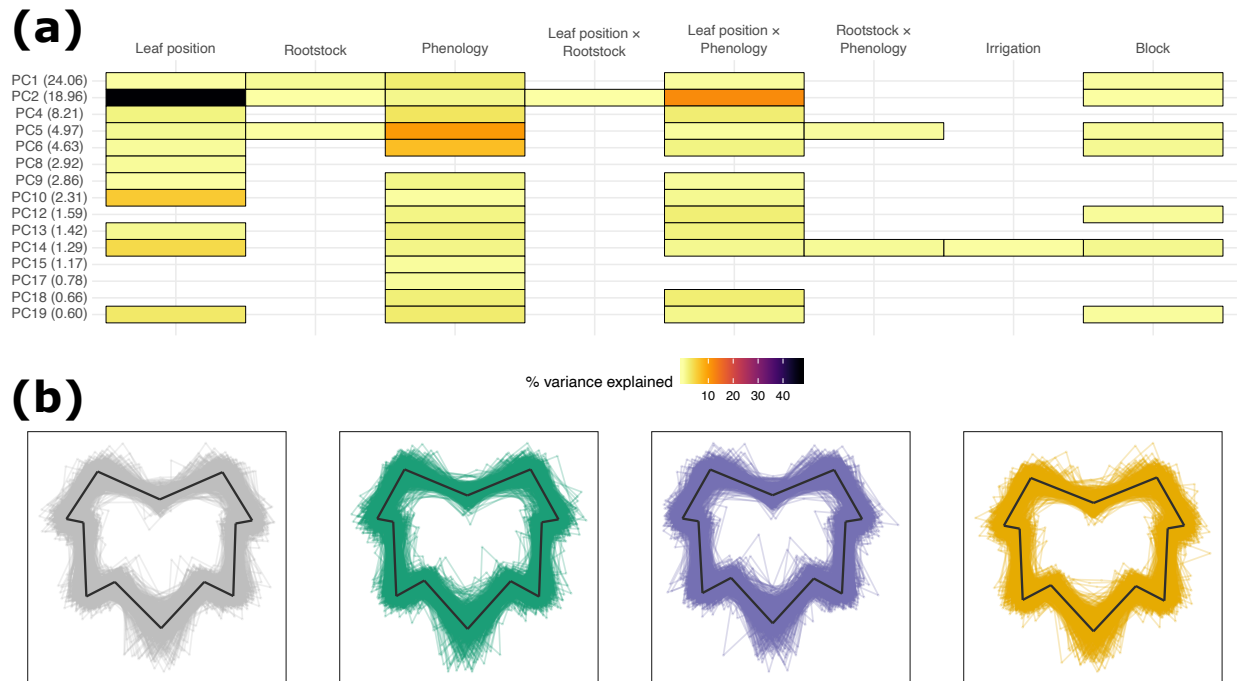

972

973

974

975

976

977

978

979

980

981

982

983 Supp Figure 4: Example correlations within and between data modalities over the course of the season  
 984 (A) Example correlation showing a strong within-modality correlation between the ionomics gPC1 and  
 985 gPC2 at anthesis. Pearson correlations by phenological stage and CIs derived from 10000 random 90%  
 986 draws are shown for each panel. Generally speaking, CIs overlapping with 0 were not accepted as  
 987 significant. (B) Example correlation showing one of the stronger between-modality correlations between  
 988 the gene expression gPC4 and morphology (shape) sPC3 at veraison. (C) Example correlation of a  
 989 relationship that is present multiple times over the course of the season between metabolomics mPC3 and  
 990 gene expression gPC6 at both veraison and harvest. (D) Example correlation that is dynamic over the  
 991 course of the growing season between the ionomics mPC3 and mPC6.

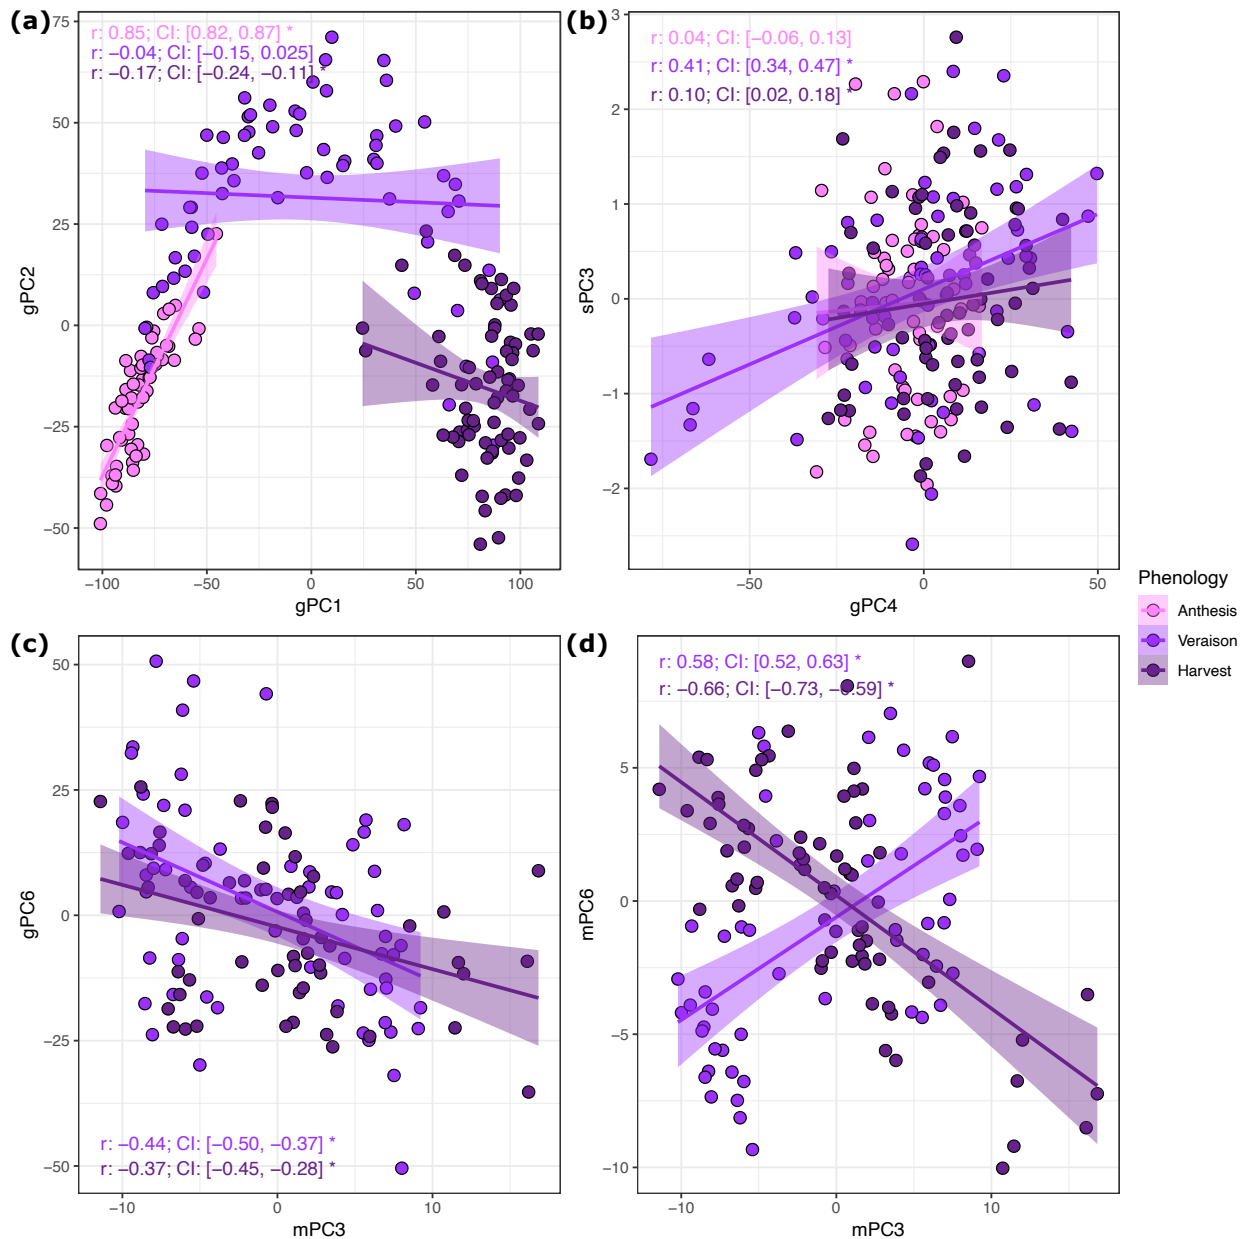

992
